# Supplementary material for: Lewis acid catalyzed C-3 alkylidenecyclopentenylation of indoles: an easy access to functionalized indoles and bisindoles
Source: Royal Society of Chemistry journal article supplement (doi:10.1039/c5ra01107h), 2015-01-01
Supplement: c5ra01107h1.pdf [file c5ra01107h1.pdf]

# Lewis Acid Catalyzed C-3 Alkylidenecyclopentenylolation of Indoles: An Easy Access to Functionalized Indoles and Bisindoles

Sarath Chand S.,<sup>a,b</sup> Sasidhar B. S.,<sup>a,b</sup> Praveen Prakash,<sup>b</sup> Sasikumar P.,<sup>b</sup> Preethanuj P.,<sup>b</sup> Florian Jaroschik,<sup>c</sup> Dominique Harakat,<sup>c</sup> Jean-Luc Vasse,<sup>c</sup> and Radhakrishnan K. V.\*<sup>a,b</sup>

<sup>a</sup>*Academy of Scientific and Innovative Research (AcSIR), New Delhi*

<sup>b</sup>*Organic Chemistry Section, National Institute for Interdisciplinary Science and Technology (CSIR), Trivandrum 695 019, India*

<sup>c</sup>*Universite' de Reims, 51687 Reims Cedex 2, France*

E-mail: [radhu2005@gmail.com](mailto:radhu2005@gmail.com)

## Table of Contents

|                                                  |         |
|--------------------------------------------------|---------|
| General Methods                                  | S2      |
| Experimental Procedures                          | S2      |
| Characterization of the Products                 | S3-S18  |
| <sup>1</sup> H NMR & <sup>13</sup> C NMR Spectra | S19-S50 |
| Supporting evidence for the mechanism            | S51     |
| ORTEP Drawing                                    | S52-S54 |

## **General Methods**

All chemicals were of the best grade commercially available and are used without further purification. All solvents were purified according to standard procedure; dry solvents were obtained according to the literature methods and stored over molecular sieves. Analytical thin layer chromatography was performed on glass plates coated with silica gel containing calcium sulfate binder. Gravity column chromatography was performed using 60-120 or 100-200 mesh silica gel and mixtures of hexane-ethyl acetate were used for elution.

Melting points were determined on a Buchi melting point apparatus and are uncorrected. Proton nuclear magnetic resonance spectra ( $^1\text{H}$  NMR) were recorded on a Bruker AMX 500 spectrophotometer ( $\text{CDCl}_3$  as solvent). Chemical shifts for  $^1\text{H}$  NMR spectra are reported as  $\delta$  in units of parts per million (ppm) downfield from  $\text{SiMe}_4$  ( $\delta$  0.0) and relative to the signal of chloroform-d ( $\delta$  7.25, singlet). Multiplicities were given as: s (singlet); d (doublet); t (triplet); q (quadret); dd (double doublet); m (multiplet). Coupling constants are reported as  $J$  value in Hz. Carbon nuclear magnetic resonance spectra ( $^{13}\text{C}$  NMR) are reported as  $\delta$  in units of parts per million (ppm) downfield from  $\text{SiMe}_4$  ( $\delta$  0.0) and relative to the signal of chloroform-d ( $\delta$  77.03, triplet). Mass spectra were recorded under EI/HRMS at 60,000 resolution using Thermo Scientific Exactive mass spectrometer. IR spectra were recorded on Bruker FT-IR spectrometer.

### **General Procedure for the Lewis acid catalyzed reaction of pentafulvene derived bicyclic hydrazines towards the synthesis of 3.**

A mixture of pentafulvene derived bicyclic hydrazine (1.2 equiv.), indole (1.0 equiv.) and  $\text{Sc}(\text{OTf})_3$  (2 mol %) were weighed in a Schlenk tube and degassed for 10 minutes. Dry  $\text{CH}_3\text{CN}$  (2 ml) was added and the reaction mixture was purged with argon and allowed to stir at room temperature for 4 hours. The solvent was evaporated in *vacuo* and the residue on silica gel (100-200 mesh) column chromatography yielded *trans*-3,4-disubstituted alkylidene cyclopentene (**3**) along with minor amount *trans*-3,4-disubstituted bisindolyl product (**4**)

### **General Procedure for the Lewis acid catalyzed reaction of pentafulvene derived bicyclic hydrazines towards the synthesis of 4.**

A mixture of pentafulvene derived bicyclic hydrazine (1.0 equiv.), indole (2.0 equiv.) and  $\text{Sc}(\text{OTf})_3$  (2 mol %) were weighed in a Schlenk tube and degassed for 10 minutes. Dry  $\text{CH}_3\text{CN}$  (2 ml) was added and the reaction mixture was purged with argon and allowed to stir at room temperature for 4 hours. The solvent was evaporated in *vacuo* and the residue on silica gel (100-200 mesh) column chromatography yielded *trans*-3,4-disubstituted bisindolyl product (**4**) along with minor amount *trans*-3,4-disubstituted *trans*-3,4-disubstituted alkylidene cyclopentene.

**Diethyl 1-(2-cyclohexylidene-5-(1H-indol-3-yl)cyclopent-3-enyl)hydrazine-1,2-dicarboxylate. (3aa)**

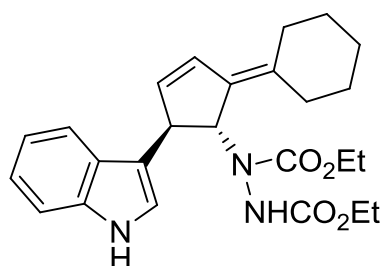

Yield: 73%; pale yellow solid; M. p. 122–124 °C;  $R_f$ : 0.31 (hexane/ethyl acetate = 3:1). **IR** (Neat)  $\nu_{\max}$ : 3334, 3054, 2976, 2920, 2853, 1709, 1586, 1458, 1410, 1330, 1220, 1120, 1052, 920, 745  $\text{cm}^{-1}$ .  **$^1\text{H NMR}$**  (500 MHz,  $\text{CDCl}_3$ , TMS):  $\delta$  8.10 (brs, 1H), 7.68 (brs, 1H), 7.29–7.23 (m, 1H), 7.16–7.13 (m, 1H), 7.06–7.03 (m, 1H), 6.84 (s, 1H), 6.53(d,  $J = 6$  Hz, 1H), 6.26 (brs, 1H), 6.04 (brs, 1H), 5.34–5.12 (m, 1H), 4.50–4.40 (m, 1H), 4.24–4.17 (m, 4H), 2.39–2.33 (m, 2H), 2.08–2.07 (m, 2H), 1.66–1.53 (m, 6H), 1.30–1.29 (m, 5H), 1.02 (brs, 1H).  **$^{13}\text{C NMR}$**  (125 MHz,  $\text{CDCl}_3$ , TMS):  $\delta$  156.6, 155.1, 136.7, 136.2, 134.0, 129.7, 126.6, 121.9, 120.0, 119.2, 118.1, 110.0, 65.4, 64.1, 62.4, 61.9, 47.4, 32.0, 31.0, 28.4, 28.1, 26.6, 14.5, 14.2.

**HRMS (ESI)**: Calcd for  $\text{C}_{25}\text{H}_{31}\text{N}_3\text{O}_4\text{Na}$ : 460.22123; Found: 460.22171.

**Diethyl 1-(2-cyclohexylidene-5-(1-methyl-1H-indol-3-yl) cyclopent-3-enyl)hydrazine-1,2-dicarboxylate. (3ab)**

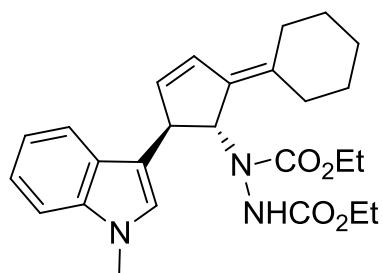

Yield: 75%; pale yellow solid; M. p. 120–122°C,  $R_f$ : 0.33 (hexane/ethyl acetate = 3:1). **IR** (Neat)  $\nu_{\max}$ : 3323, 3055, 2981, 2932, 2855, 1710, 1619, 1583, 1513, 1458, 1415, 1339, 1302, 1227, 1096, 1061, 920, 743  $\text{cm}^{-1}$ .  **$^1\text{H NMR}$**  (500 MHz,  $\text{CDCl}_3$ , TMS):  $\delta$  7.68 (brs, 1H), 7.25–7.23 (m, 2H), 7.05 (t,  $J = 7$  Hz, 1H), 6.73 (s, 1H), 6.53(d,  $J = 5.5$ , 1H), 6.23 (brs, 1H), 6.04 (s, 1H), 5.31–5.09 (m, 1H), 4.49–4.39 (m, 1H), 4.24–4.18 (m, 4H), 3.72 (s, 3H), 2.38–2.34 (m, 2H), 2.07–2.03 (m, 2H), 1.61–1.53 (m, 6H), 1.31–1.26 (m, 5H), 1.05–1.04 (brs, 1H).  **$^{13}\text{C NMR}$**  (125 MHz,  $\text{CDCl}_3$ , TMS):  $\delta$  156.4, 155.1, 137.4, 133.7, 129.6, 127.0, 125.7, 121.5, 120.1, 118.7, 109.1, 108.8, 65.5, 62.3, 61.8, 47.5, 32.5, 31.9, 28.3, 28.0, 26.5, 14.5.

**HRMS (ESI)**: Calcd for  $\text{C}_{26}\text{H}_{33}\text{N}_3\text{O}_4\text{Na}$ : 474.23688; Found: 474.23764

**Diethyl 1-(2-cyclohexylidene-5-(2-phenyl-1H-indol-3-yl) cyclopent-3-enyl)hydrazine-1,2-dicarboxylate. (3ac)**

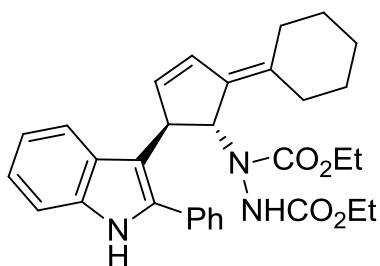

Yield: 78%; yellow viscous liquid;  $R_f$ : 0.36 (hexane/ethyl acetate = 3:1). **IR** (Neat)  $\nu_{\max}$ : 3324, 2980, 2930, 2854, 1701, 1519, 1472, 1420, 1382, 1332, 1261, 1233, 1097, 1060  $\text{cm}^{-1}$ .  **$^1\text{H}$  NMR** (500 MHz,  $\text{CDCl}_3$ , TMS):  $\delta$  8.16 (brs, 1H), 7.60-7.25 (m, 6H), 7.19-7.03 (m, 2H), 7.03 (d,  $J = 7\text{Hz}$ , 1H), 6.55 (brs, 1H), 6.20-6.03 (m, 1H), 5.91 (brs, 1H), 5.59-5.45 (m, 1H), 4.68-4.53 (m, 1H), 4.16-4.12 (m, 4H), 2.58 (brs, 1H), 2.39-2.12 (m, 3H), 1.75-1.59 (m, 6H), 1.29-0.88 (m, 6H).  **$^{13}\text{C}$  NMR** (125 MHz,  $\text{CDCl}_3$ , TMS):  $\delta$  156.2, 155.4, 137.7, 136.3, 134.7, 132.8, 129.0, 128.6, 128.2, 127.6, 125.3, 121.9, 120.3, 119.4, 110.9, 62.4, 61.7, 60.3, 48.3, 34.6, 32.1, 26.9, 26.7, 21.5, 14.5, 14.2.

**HRMS (ESI)**: Calcd for  $\text{C}_{31}\text{H}_{35}\text{N}_3\text{O}_4\text{Na}$ : 536.25253; Found: 536.25289.

**Diethyl 1-(2-cyclohexylidene-5-(5-fluoro-1H-indol-3-yl) cyclopent-3-enyl)hydrazine-1,2-dicarboxylate. (3ad)**

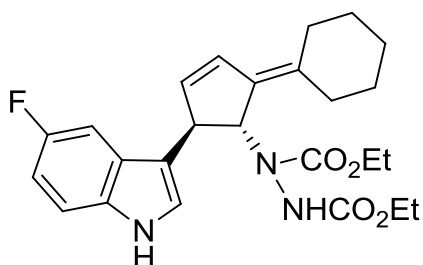

Yield: 61%; colourless viscous liquid;  $R_f$ : 0.26 (hexane/ethyl acetate = 3:1). **IR** (Neat)  $\nu_{\max}$ : 3363, 3277, 3054, 2984, 2931, 2854, 1711, 1582, 1500, 1149, 1411, 1330, 1120, 1050, 1010, 919, 744  $\text{cm}^{-1}$ .  **$^1\text{H}$  NMR** (500 MHz,  $\text{CDCl}_3$ , TMS):  $\delta$  8.26 (s, 1H), 7.34 (brs, 1H), 7.27-7.22 (m, 1H), 6.96-6.92 (brs, 1H), 6.65-6.56 (m, 2H), 6.40-6.31 (m, 1H), 6.02 (d,  $J = 3.5\text{Hz}$ , 1H), 5.32-5.11 (m, 1H), 4.46-4.18 (m, 5H), 2.41- 2.33 (m, 2H), 2.07-2.05 (m, 2H), 1.62-1.45 (m, 6H), 1.35-1.07 (m, 6H).  **$^{13}\text{C}$  NMR** (125 MHz,  $\text{CDCl}_3$ , TMS):  $\delta$  158.5, 156.8, 155.3, 136.9, 133.3, 130.0, 126.9, 123.1, 118.1, 111.5, 110.3, 104.9, 65.4, 62.6, 62.3, 47.5, 32.0, 31.1, 28.3, 28.0, 26.5, 14.4.

**HRMS (ESI)**: Calcd for  $\text{C}_{25}\text{H}_{30}\text{FN}_3\text{O}_4\text{Na}$ : 478.21180; Found: 478.21223.

**Diethyl 1-(2-cyclohexylidene-5-(5-nitro-1H-indol-3-yl) cyclopent-3-enyl)hydrazine-1,2-dicarboxylate. (3ae)**

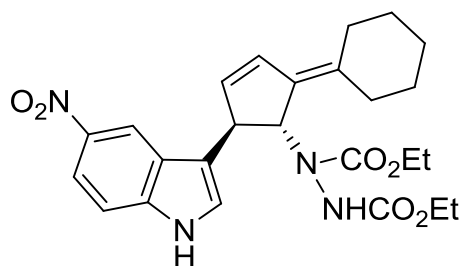

Yield: 59%; pale yellow solid; M. p. 132–134 °C.  $R_f$ : 0.22 (hexane/ethyl acetate = 3:1). **IR** (Neat)  $\nu_{\max}$ : 3365, 3071, 2960, 2852, 1712, 1623, 1582, 1469, 1410, 1380, 1318, 1245, 1173, 1115, 1058, 743  $\text{cm}^{-1}$ .  **$^1\text{H NMR}$**  (500 MHz,  $\text{CDCl}_3$ , TMS):  $\delta$  9.22 (brs, 1H), 8.56(s, 1H), 7.92 (brs, 1H), 7.17-7.13 (m, 1H), 6.92-6.82 (m, 1H), 6.61 (d, 1H,  $J = 4.5\text{Hz}$ ), 6.34 (brs, 1H), 5.98 (brs, 1H), 5.39-5.17 (m, 1H), 4.49-4.23 (m, 5H), 2.56-2.06 (m, 4H), 1.76-1.22 (m, 12H).  **$^{13}\text{C NMR}$**  (125 MHz,  $\text{CDCl}_3$ , TMS):  $\delta$  156.3, 155.6, 141.3, 139.8, 137.7, 130.1, 129.0, 128.2, 125.5, 125.3, 124.2, 117.6, 117.2, 111.0, 64.3, 62.9, 62.2, 47.5, 32.1, 31.3, 28.2, 26.6, 21.5, 14.5, 14.2.

**HRMS (ESI)**: Calcd for  $\text{C}_{25}\text{H}_{30}\text{N}_4\text{O}_6\text{Na}$ : 505.20630; Found: 505.20668.

**Diethyl 1-(2-cyclohexylidene-5-(5-hydroxy-1H-indol-3-yl) cyclopent-3-enyl) hydrazine-1,2-dicarboxylate. (3af)**

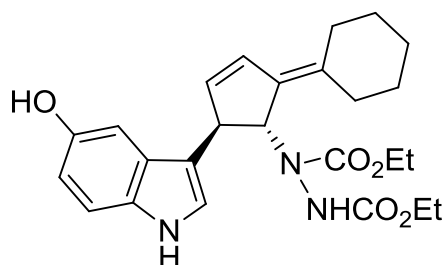

Yield: 56%; pale yellow viscous liquid;  $R_f$ : 0.17 (hexane/ethyl acetate = 3:1). **IR** (Neat)  $\nu_{\max}$ : 3380, 3280, 3054, 2976, 2928, 2853, 1709, 1586, 1499, 1149, 1410, 1330, 1220, 1120, 1052, 1011, 920, 745  $\text{cm}^{-1}$ .  **$^1\text{H NMR}$**  (500 MHz,  $\text{CDCl}_3$ , TMS):  $\delta$  7.89 (brs, 1H), 7.23-7.15 (m, 2H), 6.79-6.77 (m, 1H), 6.56-6.28 (m, 2H), 6.05 (brs, 1H), 5.32-5.09 (m, 1H), 4.45-4.11 (m, 5H), 2.37-2.33 (m, 2H), 2.07-2.06 (m, 2H), 1.60-1.38 (m, 6H), 1.29-1.13 (m, 5H), 0.99 (brs, 1H).  **$^{13}\text{C NMR}$**  (125 MHz,  $\text{CDCl}_3$ , TMS):  $\delta$  155.2, 154.5, 147.5, 135.8, 135.0, 134.3, 127.2, 126.8, 125.3, 111.9, 111.8, 108.5, 104.5, 64.9, 62.8, 62.2, 41.9, 32.0, 28.2, 26.5, 19.4, 19.2, 14.5.

**HRMS (ESI)**: Calcd for  $\text{C}_{25}\text{H}_{31}\text{N}_3\text{O}_5\text{Na}$ : 476.21614; Found: 476.21658.

**Diisopropyl 1-(2-cyclohexylidene-5-(1H-indol-3-yl)cyclopent-3-enyl)hydrazine-1,2-dicarboxylate. (3ba)**

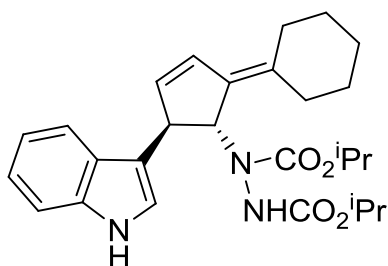

Yield: 72%; pale yellow viscous liquid;  $R_f$ : 0.33 (hexane/ethyl acetate = 3:1). **IR** (Neat)  $\nu_{\max}$ : 3331, 3068, 2981, 2932, 2857, 1688, 1621, 1583, 1514, 1462, 1380, 1304, 1238, 1108, 1042, 957, 931, 743  $\text{cm}^{-1}$ .  **$^1\text{H NMR}$**  (500 MHz,  $\text{CDCl}_3$ , TMS):  $\delta$  8.16 (brs, 1H), 7.75-7.71 (m, 1H), 7.31-7.23 (m, 1H), 7.18-7.05 (m, 2H), 6.88 (brs, 1H), 6.56-6.27 (m, 2H), 6.07 (brs, 1H), 5.34-5.14 (m, 1H), 5.00-4.95 (m, 2H), 4.53-4.43 (m, 1H), 2.36 (brs, 2H), 2.09-1.81 (m, 2H), 1.61-1.51 (m, 6H), 1.44-1.22 (m, 12H).  **$^{13}\text{C NMR}$**  (125 MHz,  $\text{CDCl}_3$ , TMS):  $\delta$  156.5, 154.7, 136.8, 133.8, 129.8, 129.0, 128.2, 126.7, 125.3, 121.7, 119.1, 110.9, 69.9, 69.5, 63.9, 47.2, 31.6, 30.8, 29.7, 28.3, 26.9, 22.7, 22.4, 22.1.

**HRMS (ESI)**: Calcd for  $\text{C}_{27}\text{H}_{35}\text{N}_3\text{O}_5\text{Na}$ : 488.25253; Found: 488.25286.

**Di-tert-butyl 1-(2-cyclohexylidene-5-(1H-indol-3-yl) cyclopent-3-enyl)hydrazine-1,2-dicarboxylate. (3ca)**

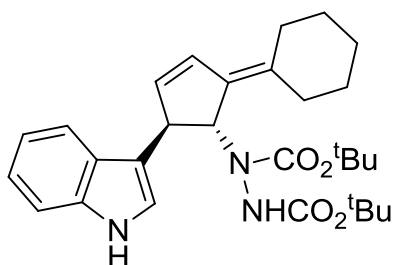

Yield: 42%; pale yellow viscous liquid;  $R_f$ : 0.40 (hexane/ethyl acetate = 3:1). **IR** (Neat)  $\nu_{\max}$ : 3375, 3078, 2992, 2943, 2836, 1690, 1610, 1583, 1565, 1468, 1462, 1400, 1316, 1238, 1152, 1123, 969, 938, 746  $\text{cm}^{-1}$ .  **$^1\text{H NMR}$**  (500 MHz,  $\text{CDCl}_3$ , TMS):  $\delta$  8.00 (d,  $J = 11\text{Hz}$ , 1H), 7.99-7.79 (m, 1H), 7.32-7.28 (m, 1H), 7.20-7.06 (m, 2H), 6.87 (s, 1H), 6.55 (d,  $J = 5.5\text{Hz}$ , 1H), 6.15-6.00 (m, 2H), 5.30-5.08 (m, 1H), 4.54-4.44 (m, 1H), 2.37 (brs, 2H), 2.12 (brs, 2H), 1.63-1.53 (m, 24H).  **$^{13}\text{C NMR}$**  (125 MHz,  $\text{CDCl}_3$ , TMS):  $\delta$  155.7, 154.0, 136.7, 136.5, 126.7, 122.1, 121.8, 119.2, 118.2, 111.1, 110.9, 110.7, 81.3, 80.7, 65.5, 44.3, 32.0, 31.1, 28.3, 28.2, 28.0, 26.6.

**HRMS (ESI)**: Calcd for  $\text{C}_{29}\text{H}_{39}\text{N}_3\text{O}_4\text{Na}$ : 516.28383; Found: 516.28414.

**Dibenzyl 1-(2-cyclohexylidene-5-(1H-indol-3-yl) cyclopent-3-enyl)hydrazine-1,2-dicarboxylate. (3da)**

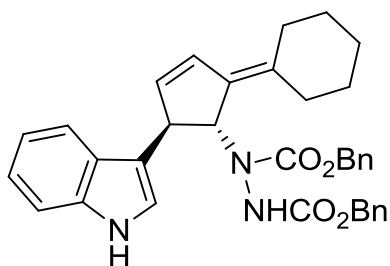

Yield: 39%; yellow viscous liquid;  $R_f$ : 0.31 (hexane/ethyl acetate = 3:1). **IR** (Neat)  $\nu_{\max}$ : 3358, 3059, 3027, 2920, 2858, 1702, 1580, 1489, 1449, 1400, 1311, 1281, 1050, 1000, 743  $\text{cm}^{-1}$ .  **$^1\text{H}$  NMR** (500 MHz,  $\text{CDCl}_3$ , TMS):  $\delta$  8.28 (brs, 1H), 7.66 (brs, 1H), 7.39-6.90 (m, 13H), 6.75 (brs, 2H), 6.46 (s, 1H), 5.98-5.86 (m, 1H), 5.36-5.05 (m, 5H), 4.52-4.29 (m, 1H), 2.36-2.32 (m, 2H), 2.02-1.94 (m, 2H), 1.56-1.26 (m, 6H).  **$^{13}\text{C}$  NMR** (125 MHz,  $\text{CDCl}_3$ , TMS):  $\delta$  156.4, 154.8, 136.7, 135.8, 133.4, 128.6, 128.5, 128.3, 128.2, 127.9, 126.6, 122.0, 121.2, 119.9, 119.4, 117.5, 110.9, 68.1, 67.6, 47.5, 32.0, 31.0, 28.3, 28.0, 26.5.

**HRMS (ESI)**: Calcd for  $\text{C}_{35}\text{H}_{35}\text{N}_3\text{O}_4\text{Na}$ : 584.25253; Found: 584.25288.

**Diethyl 1-(2-(1H-indol-3-yl)-5-(propan-2-ylidene) cyclopent-3-enyl) hydrazine-1,2-dicarboxylate. (3ea)**

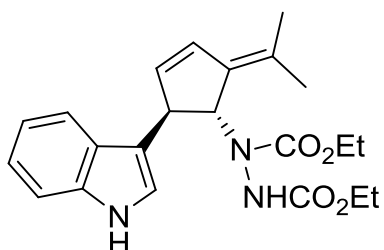

Yield: 69%; colourless viscous liquid;  $R_f$ : 0.29 (hexane/ethyl acetate = 3:1). **IR** (Neat)  $\nu_{\max}$ : 3317, 3056, 2982, 2931, 1719, 1620, 1582, 1512, 1415, 1382, 1229, 1096, 1062, 744  $\text{cm}^{-1}$ .  **$^1\text{H}$  NMR** (500 MHz,  $\text{CDCl}_3$ , TMS):  $\delta$  8.30 (s, 1H), 7.71 (brs, 1H), 7.34-7.27 (m, 1H), 7.19-7.08 (m, 2H), 6.86-6.78 (m, 2H), 6.52 (d, 1H,  $J = 5\text{Hz}$ ), 6.05 (s, 1H), 5.35-5.14 (m, 1H), 4.53-4.18 (m, 5H), 1.89 (s, 3H), 1.67 (brs, 3H), 1.29-1.26 (m, 6H).  **$^{13}\text{C}$  NMR** (125 MHz,  $\text{CDCl}_3$ , TMS):  $\delta$  156.9, 155.8, 136.8, 136.6, 135.5, 129.0, 126.7, 125.3, 121.7, 119.9, 119.1, 119.0, 117.9, 111.3, 66.0, 62.6, 62.2, 47.6, 21.5, 14.4.

**HRMS (ESI)**: Calcd for  $\text{C}_{22}\text{H}_{27}\text{N}_3\text{O}_4\text{Na}$ : 420.18993; Found: 420.18866.

**Diethyl 1-(2-(1-methyl-1H-indol-3-yl)-5-(propan-2-ylidene) cyclopent-3-enyl) hydrazine-1,2-dicarboxylate. (3eb)**

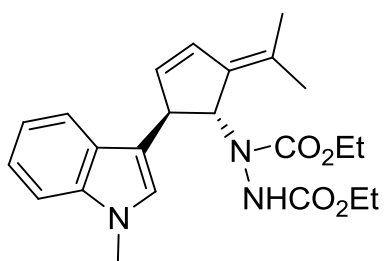

Yield: 65%; colourless solid; M. p. 124–126 °C,  $R_f$ : 0.33 (hexane/ethyl acetate = 3:1). **IR** (Neat)  $\nu_{\max}$ : 3385, 3055, 2981, 2924, 1707, 1611, 1474, 1413, 1379, 1321, 1265, 1219, 1163, 1122, 1061, 1021, 933, 739  $\text{cm}^{-1}$ .  **$^1\text{H}$  NMR** (500 MHz,  $\text{CDCl}_3$ , TMS):  $\delta$  7.73 (s, 1H), 7.29–7.23 (m, 2H), 7.10 (t,  $J = 7\text{Hz}$ , 1H), 6.77 (brs, 1H), 6.53 (d,  $J = 5\text{Hz}$ , 1H), 6.39 (brs, 1H), 6.07 (s, 1H), 5.36–5.14 (m, 1H), 4.53–4.20 (m, 5H), 3.73 (s, 3H), 1.90 (s, 3H), 1.69 (s, 3H), 1.31–1.05 (m, 6H).  **$^{13}\text{C}$  NMR** (125 MHz,  $\text{CDCl}_3$ , TMS):  $\delta$  156.7, 155.6, 137.5, 136.7, 135.6, 130.5, 128.3, 127.1, 125.9, 121.6, 120.1, 118.8, 116.7, 109.0, 66.2, 62.5, 61.9, 47.5, 32.6, 21.5, 13.8.

**HRMS (ESI)**: Calcd for  $\text{C}_{23}\text{H}_{29}\text{N}_3\text{O}_4\text{Na}$ : 434.20588; Found: 434.20615.

**Diethyl 1-(2-cycloheptylidene-5-(1H-indol-3-yl)cyclopent-3-enyl)hydrazine-1,2-dicarboxylate. (3fa)**

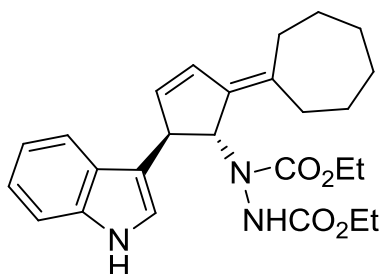

Yield: 70%; colourless viscous liquid;  $R_f$ : 0.31 (hexane/ethyl acetate = 3:1). **IR** (Neat)  $\nu_{\max}$ : 3348, 3056, 2924, 2853, 1708, 1617, 1458, 1414, 1380, 1226, 1177, 1121, 1061, 741  $\text{cm}^{-1}$ .  **$^1\text{H}$  NMR** (500 MHz,  $\text{CDCl}_3$ , TMS):  $\delta$  8.09 (brs, 1H), 7.66 (brs, 1H), 7.28 (brs, 1H), 7.16–7.04 (m 2H), 6.84 (brs, 1H), 6.51 (d,  $J = 5.5\text{Hz}$ , 1H), 6.25–6.21 (m, 1H), 6.04 (brs, 1H), 5.33–5.11 (m, 1H), 4.50–4.18 (m, 5H), 2.50–2.41 (m, 2H), 2.20–2.16 (brs, 2H), 1.71–1.03 (m, 14H).  **$^{13}\text{C}$  NMR** (125 MHz,  $\text{CDCl}_3$ , TMS):  $\delta$  156.3, 155.5, 136.8, 129.0, 128.2, 126.6, 125.3, 121.7, 119.0, 119.0, 111.1, 62.4, 61.9, 47.6, 32.7, 32.3, 29.1, 28.2, 27.6, 14.5, 14.2.

**HRMS (ESI)**: Calcd for  $\text{C}_{26}\text{H}_{33}\text{N}_3\text{O}_4\text{Na}$ : 474.23688; Found: 474.23714.

**Compound 3ga**



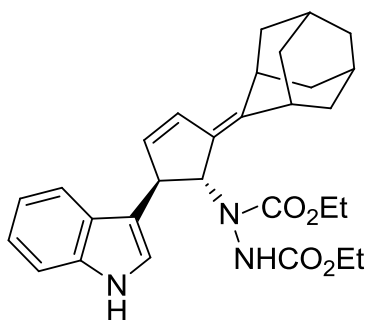

**Yield:** 66%; colourless viscous liquid;  $R_f$ : 0.33 (hexane/ethyl acetate = 3:1). **IR** (Neat)  $\nu_{\max}$ : 3323, 3057, 2920, 2848, 1713, 1620, 1475, 1413, 1381, 1305, 1294, 1216, 1116, 1085, 1065, 1025, 742  $\text{cm}^{-1}$ .  **$^1\text{H NMR}$**  (500 MHz,  $\text{CDCl}_3$ , TMS):  $\delta$  8.21 (brs, 1H), 7.70 (brs, 1H), 7.32-7.25 (m, 2H), 7.20-7.05 (m, 3H), 6.86 (brs, 1H), 6.56 (d,  $J=5.5\text{Hz}$ , 1H), 6.29 (brs, 1H), 6.05 (brs, 1H), 5.39-5.16 (m, 1H), 4.53-4.41 (m, 1H), 4.30-4.13(m, 4H), 3.06 (brs,1H), 2.59 (brs,1H), 2.08-1.64 (m, 12H), 1.35-1.08 (m, 6H).  **$^{13}\text{C NMR}$**  (125 MHz,  $\text{CDCl}_3$ , TMS):  $\delta$  156.7, 155.2, 144.4, 136.5, 130.2, 129.0, 128.3, 126.6, 125.3, 121.4, 121.1, 119.9, 119.0, 117.1, 111.1, 63.8, 62.5, 62.0, 47.6, 39.9, 39.5, 39.1, 37.0, 35.1, 34.4, 28.1, 28.0, 21.5, 14.6.

**HRMS (ESI):** Calcd for  $\text{C}_{29}\text{H}_{35}\text{N}_3\text{O}_4$ : 512.25253; Found: 515.25290.

### Compound 3gb

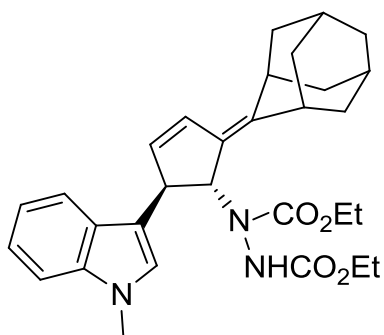

**Yield:** 70%; pale yellow viscous liquid;  $R_f$ : 0.36 (hexane/ethyl acetate = 3:1). **IR** (Neat)  $\nu_{\max}$ : 3315, 3054, 2910, 2852, 1711, 1612, 1472, 1413, 1379, 1305, 1221, 1124, 1061, 1019, 740  $\text{cm}^{-1}$ .  **$^1\text{H NMR}$**  (500 MHz,  $\text{CDCl}_3$ , TMS):  $\delta$  7.71 (brs, 1H), 7.7-7.21 (m, 2H), 7.07 (t,  $J=7\text{Hz}$ , 1H), 6.80 (brs, 1H), 6.55 (d,  $J=5.5\text{Hz}$ , 1H), 6.25 (brs, 1H), 6.05 (s, 1H), 5.35-5.12 (m, 1H), 4.53-4.28 (m, 1H), 4.23-4.13 (m, 4H), 3.75 (s, 3H), 3.05 (s, 1H), 2.58 (brs, 1H), 2.02-1.63 (m, 12H), 1.37-1.09 (m, 6H).  **$^{13}\text{C NMR}$**  (125 MHz,  $\text{CDCl}_3$ , TMS):  $\delta$  156.6, 154.9, 137.4, 130.2, 127.1, 125.8, 121.5, 120.2, 118.7, 108.9, 62.3, 61.9, 47.2, 39.6, 37.0, 35.1, 34.7, 32.6, 28.1, 26.9, 25.3, 22.9, 20.8, 14.9.

**HRMS (ESI):** Calcd for  $\text{C}_{30}\text{H}_{37}\text{N}_3\text{O}_4\text{Na}$ : 526.26818; Found: 526.26862.

### Compound 3gc

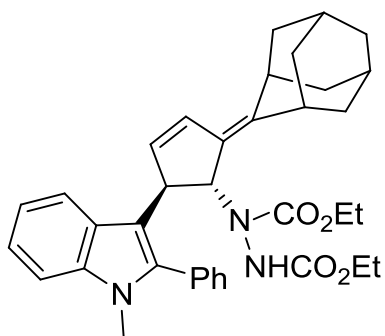

Yield: 66%; pale yellow viscous liquid;  $R_f$ : 0.38 (hexane/ethyl acetate = 3:1). **IR** (Neat)  $\nu_{\max}$ : 3378, 3058, 2978, 2908, 2848, 1756, 1704, 1467, 1445, 1409, 1379, 1364, 1338, 1308, 1277, 1248, 1218, 1172, 1157, 1097, 1062, 1022  $\text{cm}^{-1}$ .  **$^1\text{H NMR}$**  (500 MHz,  $\text{CDCl}_3$ , TMS):  $\delta$  7.58-7.44 (m, 6H), 7.33-7.19 (m, 3H), 7.04 (brs, 1H), 6.50-6.42 (m, 1H), 6.12-5.81 (m, 2H), 5.45 (brs, 1H), 4.25-4.15 (m, 4H), 3.58 (s, 3H), 3.06 (brs, 1H), 2.65-2.61 (m, 1H), 2.03-1.85 (m, 10H), 1.59-1.25 (m, 2H), 1.01-0.87 (m, 6H).  **$^{13}\text{C NMR}$**  (125 MHz,  $\text{CDCl}_3$ , TMS):  $\delta$  156.4, 155.3, 137.4, 131.3, 130.6, 128.1, 128.0, 121.5, 120.2, 119.0, 113.5, 109.3, 65.9, 62.3, 61.7, 47.8, 39.5, 39.4, 37.0, 35.1, 34.6, 30.8, 28.2, 28.1, 14.7.

**HRMS (ESI)**: Calcd for  $\text{C}_{36}\text{H}_{41}\text{N}_3\text{O}_4\text{Na}$ : 602.29948; Found: 602.29977.

**Diethyl 1-(2-(diphenylmethylene)-5-(1-methyl-1H-indol-3-yl)cyclopent-3-enyl)hydrazine-1,2-dicarboxylate. (3ha)**

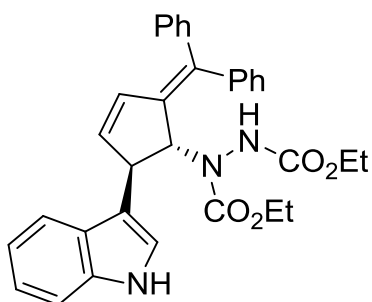

Yield: 62%; pale yellow solid, M. p. 182–184°C;  $R_f$ : 0.24 (hexane/ethyl acetate = 3:1). **IR** (Neat)  $\nu_{\max}$ : 3362, 3051, 2968, 2911, 2852, 1736, 1710, 1552, 1514, 1467, 1454, 1411, 1384, 1364, 1308, 1287, 1243, 1231, 1168, 1157, 1069, 1063, 1022, 742  $\text{cm}^{-1}$ .  **$^1\text{H NMR}$**  (500 MHz,  $\text{CDCl}_3$ , TMS):  $\delta$  7.85-7.79 (m, 1H), 7.42-7.03 (m, 12H), 6.90-6.59 (m, 3H), 6.32-6.22 (brs, 1H), 6.04-5.91 (m, 2H), 5.08 (brs, 1H), 4.23-4.13 (m, 4H), 3.92-3.73 (m, 1H), 1.35-1.01 (m, 6H).  **$^{13}\text{C NMR}$**  (125 MHz,  $\text{CDCl}_3$ , TMS):  $\delta$  156.0, 154.7, 142.5, 142.4, 141.3, 140.8, 137.4, 130.0, 129.9, 128.6, 128.2, 127.7, 127.4, 126.8, 121.6, 120.2, 119.1, 116.9, 115.5, 110.2, 65.6, 62.0, 61.8, 47.9, 14.8.

**HRMS (ESI)**: Calcd for  $\text{C}_{32}\text{H}_{31}\text{N}_3\text{O}_4\text{Na}$ : 544.22123; Found: 544.22151.

**Diethyl 1-(2-(diphenylmethylene)-5-(1-methyl-1H-indol-3-yl)cyclopent-3-enyl)hydrazine-1,2-dicarboxylate. (3hb)**

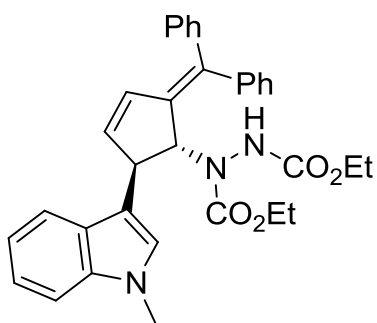

Yield: 68%; yellow viscous liquid;  $R_f$ : 0.29 (hexane/ethyl acetate = 3:1). **IR** (Neat)  $\nu_{\max}$ : 3340, 3068, 2981, 2932, 2857, 1688, 1621, 1602, 1583, 1555, 1514, 1462, 1380, 1315, 1238, 1108, 1042, 931, 743  $\text{cm}^{-1}$ .  **$^1\text{H}$  NMR** (500 MHz,  $\text{CDCl}_3$ , TMS):  $\delta$  7.79 (brs, 1H), 7.34-7.19 (m, 14H), 7.09-6.97 (m, 2H), 6.61-6.55 (m, 1H), 6.32 (brs, 1H), 5.82-5.56 (m, 2H), 4.70-4.65 (m, 1H), 4.25-4.15 (m, 4H), 3.76 (brs, 3H), 1.32- 1.29 (m, 4H), 1.03 (brs, 1H), 0.69 (brs, 1H).  **$^{13}\text{C}$  NMR** (125 MHz,  $\text{CDCl}_3$ , TMS):  $\delta$  156.9, 154.9, 142.6, 142.3, 141.3, 140.7, 137.4, 130.0, 129.9, 128.5, 128.1, 127.4, 127.3, 127.1, 126.6, 121.4, 120.2, 118.8, 116.0, 115.3, 108.9, 65.5, 62.0, 61.8, 47.6, 32.6, 14.5, 13.8.

**HRMS (ESI)**: Calcd for  $\text{C}_{33}\text{H}_{33}\text{N}_3\text{O}_4\text{Na}$ : 558.23688; Found: 558.23721.

### 3, 3'-(5-Cyclohexylidenecyclopent-3-ene-1, 2-diyl)bis(1H-indole) (4aa)

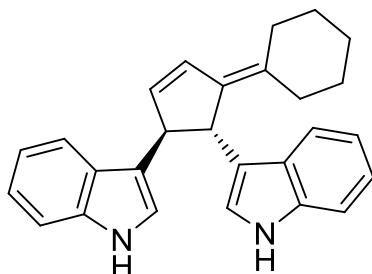

Yield: 64%; pale yellow coloured solid. M. p. 152–156°C;  $R_f$ : 0.43 (hexane/ethyl acetate = 3:1). **IR** (Neat)  $\nu_{\max}$ : 3405, 2922, 2851, 2362, 2349, 1590, 1459, 1421, 1364, 1120, 1033  $\text{cm}^{-1}$ .  **$^1\text{H}$  NMR** (500 MHz,  $\text{CDCl}_3$ , TMS):  $\delta$  7.93 (s, 1H), 7.85 (s, 1H), 7.61-7.57 (m, 2H), 7.38-7.34 (m, 2H), 7.22-7.17 (m, 2H), 7.09-6.94 (m, 4H), 6.78 (d,  $J = 5.5\text{Hz}$ , 1H), 6.04 (dd,  $J_1 = 5.5\text{Hz}$ ,  $J_2 = 2.5\text{Hz}$ , 1H), 4.32 (brs, 1H), 4.19 (brs, 1H), 2.46 (t,  $J = 6\text{ Hz}$ , 2H), 2.04-1.97 (m, 2H), 1.67-1.29 (m, 6H).  **$^{13}\text{C}$  NMR**(125MHz, $\text{CDCl}_3$ , TMS):  $\delta$ 139.1, 136.9, 135.9, 133.0, 129.9, 129.1, 128.3, 126.7, 126.6, 125.4, 121.9, 121.8, 121.0, 120.9, 120.2, 120.1, 119.6, 118.9, 111.2, 111.0, 52.3, 45.8, 32.1, 31.8, 28.6, 27.7, 26.9.

**HRMS (ESI)**: Calcd for  $\text{C}_{27}\text{H}_{26}\text{N}_2\text{Na}$ : 401.19937; Found: 401.19968.

### 3,3'-(5-Cyclohexylidenecyclopent-3-ene-1,2-diyl)bis(1-methyl-1H-indole) (4ab)

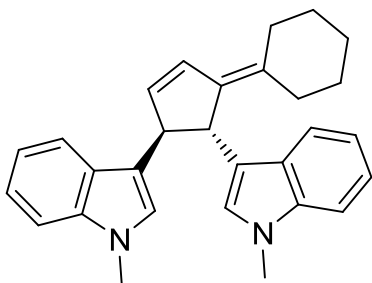

Yield: 58%; pale yellow viscous liquid;  $R_f$ : 0.48 (hexane/ethyl acetate = 3:1). **IR** (Neat)  $\nu_{\max}$ : 2935, 2855, 2358, 2353, 1680, 1595, 1449, 1431, 1358, 1156, 1120, 1033  $\text{cm}^{-1}$ .  **$^1\text{H NMR}$**  (500 MHz,  $\text{CDCl}_3$ , TMS):  $\delta$  7.56-7.52 (m, 2H), 7.28-7.16 (m, 4H), 7.14-6.99 (m, 2H), 6.83 (s, 1H), 6.75 (s, 1H), 6.71 (dd,  $J_1 = 5.5\text{Hz}$ ,  $J_2 = 1\text{Hz}$ , 1H), 5.97 (dd,  $J_1 = 5.5\text{Hz}$ ,  $J_2 = 2.5\text{Hz}$ , 1H), 4.26 (s, 1H), 4.11 (s, 1H), 3.77 (s, 3H), 3.74 (s, 3H), 2.45-2.41 (m, 2H), 2.02-2.00 (m, 1H), 1.94-1.92 (m, 1H), 1.63-1.45 (m, 4H), 1.34-1.31 (m, 1H), 1.18-1.17 (m, 1H).  **$^{13}\text{C NMR}$**  (125 MHz,  $\text{CDCl}_3$ , TMS):  $\delta$  139.2, 137.5, 137.4, 136.1, 132.8, 129.6, 129.0, 128.2, 127.1, 126.9, 125.6, 125.3, 121.5, 121.3, 120.4, 120.3, 120.2, 118.8, 118.6, 118.3, 109.1, 108.9, 52.3, 45.7, 32.6, 32.5, 32.0, 31.9, 28.6, 27.7, 26.9.

**HRMS (ESI)**: Calcd for  $\text{C}_{29}\text{H}_{30}\text{N}_2\text{Na}$ : 429.23067; Found: 429.23102.

### 3,3'-(5-Cyclohexylidene-cyclopent-3-ene-1,2-diyl)bis(2-phenyl-1H-indole) (4ac)

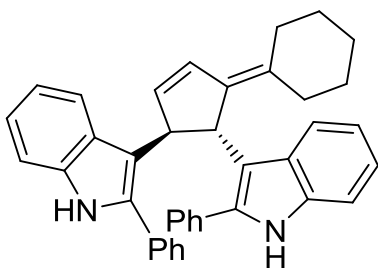

Yield: 54%; Pale yellow solid. M. p 160–164°C;  $R_f$ : 0.52 (hexane/ethyl acetate = 3:1). **IR** (Neat)  $\nu_{\max}$ : 3342, 3075, 2953, 2912, 2857, 1695, 1611, 1514, 1462, 1380, 1238, 1100, 1030, 931, 740  $\text{cm}^{-1}$ .  **$^1\text{H NMR}$**  (500 MHz,  $\text{CDCl}_3$ , TMS):  $\delta$  7.98 (s, 1H), 7.88 (s, 1H), 7.68 (d,  $J = 8\text{Hz}$ , 1H), 7.59 (d,  $J = 8\text{Hz}$ , 1H), 7.42-7.37 (m, 4H), 7.28-6.80 (m, 13H), 6.14 (m, 1H), 4.76 (brs, 1H), 4.71 (brs, 1H), 2.51-2.49 (m, 1H), 2.38-2.18 (m, 1H), 1.83-1.07 (m, 8H).  **$^{13}\text{C NMR}$**  (125 MHz,  $\text{CDCl}_3$ , TMS):  $\delta$  138.4, 136.5, 136.4, 136.3, 135.1, 134.5, 133.4, 132.6, 132.5, 130.5, 128.4, 128.3, 128.2, 127.9, 127.8, 127.4, 127.3, 122.3, 122.2, 121.3, 120.9, 119.6, 119.2, 117.3, 114.7, 110.5, 110.3, 50.6, 44.8, 32.5, 30.8, 28.6, 27.1, 26.8.

**HRMS (ESI)**: Calcd for  $\text{C}_{39}\text{H}_{34}\text{N}_2\text{Na}$ : 553.26197; Found: 553.26233.

### 3,3'-(5-Cyclohexylidene-cyclopent-3-ene-1,2-diyl)bis(5-fluoro-1H-indole). (4ad)

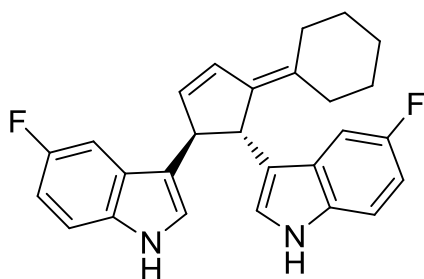

Yield: 52%; pale yellow viscous liquid;  $R_f$ : 0.40 (hexane/ethyl acetate = 3:1). **IR** (Neat)  $\nu_{\max}$ : 3356, 3052, 2978, 2939, 2849, 1689, 1619, 1583, 1514, 1462, 1415, 1402, 1380, 1304, 1238, 1111, 1047, 942, 740  $\text{cm}^{-1}$ .  **$^1\text{H NMR}$**  (500 MHz,  $\text{CDCl}_3$ , TMS):  $\delta$  8.03 (s, 1H), 7.94 (s, 1H), 7.31-7.20 (m, 4H), 7.07 (s, 1H), 7.00-6.77 (m, 4H), 6.00 (t, 1H,  $J = 3\text{Hz}$ ), 4.22 (s, 1H), 4.09 (s, 1H), 2.46- 2.42 (m, 2H), 2.06-2.04 (m, 1H), 1.96- 1.94 (m, 1H), 1.67- 1.44 (m, 6H).  **$^{13}\text{C NMR}$**  (125 MHz,  $\text{CDCl}_3$ , TMS):  $\delta$  158.5, 156.7, 138.5, 135.3, 133.8, 133.5, 130.3, 126.9, 122.9, 122.7, 121.9, 120.3, 111.7, 111.6, 110.5, 110.3, 110.2, 105.2, 105.0, 45.6, 32.0, 31.8, 28.5, 27.6, 26.8.

**HRMS (ESI)**: Calcd for  $\text{C}_{27}\text{H}_{24}\text{F}_2\text{N}_2\text{Na}$ : 437.18052; Found: 437.18088.

### 3,3'-(5-Cyclohexylidene-1,2-dicyclopent-3-ene-1,2-diyl)bis(5-nitro-1H-indole) . (4ae)

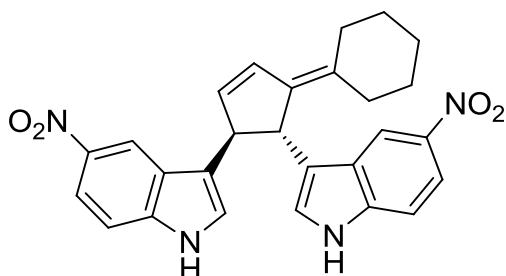

Yield: 48%; orange red viscous liquid;  $R_f$ : 0.40 (hexane/ethyl acetate = 3:1). **IR** (Neat)  $\nu_{\max}$ : 3326, 3056, 2955, 2932, 2850, 1675, 1629, 1583, 1457, 1385, 1300, 1238, 1100, 1040, 931, 7445  $\text{cm}^{-1}$ .  **$^1\text{H NMR}$**  (500 MHz,  $\text{CDCl}_3$ , TMS):  $\delta$  8.91 (s, 1H), 8.74 (s, 1H), 8.53-8.52 (m, 2H), 8.12- 8.09 (m, 2H), 7.45-7.41 (m, 2H), 7.26 (d,  $J = 10.5\text{Hz}$ , 1H), 7.14 (s, 1H), 6.86 (d,  $J = 5.5\text{Hz}$ , 1H), 5.99 (d,  $J = 4.5\text{Hz}$ , 1H), 4.33 (s, 1H), 4.22 (brs, 1H), 2.61-2.58 (m, 1H), 2.44-2.42 (m, 1H), 2.07-2.04 (m, 1H), 1.93-1.90 (m, 1H), 1.89-1.37 (m, 6H).  **$^{13}\text{C NMR}$**  (125 MHz,  $\text{CDCl}_3$ , TMS):  $\delta$  141.4, 141.2, 140.1, 140.0, 137.6, 135.1, 134.6, 130.9, 125.9, 125.7, 124.1, 124.0, 123.8, 122.2, 117.7, 117.6, 117.5, 112.9, 111.3, 52.3, 45.7, 32.1, 32.0, 28.2, 27.7, 26.7.

**HRMS (ESI)**: Calcd for  $\text{C}_{27}\text{H}_{24}\text{N}_2\text{O}_4\text{Na}$ : 491.16952; Found: 491.16993.

### 3,3'-(5-Cyclohexylidene-1,2-dicyclopent-3-ene-1,2-diyl)bis(1H-indol-5-ol). (4af)

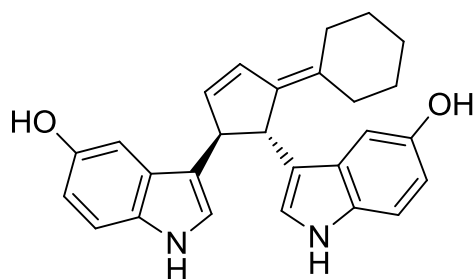

Yield: 39%; pale yellow viscous liquid;  $R_f$ : 0.19 (hexane/ethyl acetate = 3:1). **IR** (Neat)  $\nu_{\max}$ : 3339, 3061, 2990, 2940, 2842, 1680, 1623, 1580, 1514, 1380, 1302, 1240, 1110, 1042, 931, 740  $\text{cm}^{-1}$ .  **$^1\text{H NMR}$**  (500 MHz,  $\text{CDCl}_3$ , TMS):  $\delta$  7.87 (brs, 1H), 7.78 (brs, 1H), 7.27-7.22 (m, 2H), 7.03-6.98 (m, 3H), 6.92 (d  $J = 2\text{Hz}$ , 1H), 6.81-6.74 (m 3H), 6.01-6.00 (dd,  $J_1 = 6\text{ Hz}$ ,  $J_2 = 3\text{ Hz}$ , 1H), 4.82 (d,  $J = 6.5\text{Hz}$ , 2H), 4.16 (s, 1H), 4.07(s, 1H), 2.45-2.39 (m, 2H), 1.99-1.94 (m, 2H), 1.50-1.44 (m 3H), 1.33-0.87 (m 5H).  **$^{13}\text{C NMR}$**  (125 MHz,  $\text{CDCl}_3$ , TMS):  $\delta$  149.1, 148.9, 138.8, 135.6, 133.1, 132.1, 130.0, 127.3, 122.2, 121.3, 119.8, 111.8, 111.7, 111.6, 111.6, 104.8, 104.7, 51.7, 45.8, 32.0, 31.8, 28.6, 27.6, 26.8.

**HRMS (ESI)**: Calcd for  $\text{C}_{27}\text{H}_{26}\text{N}_2\text{O}_2\text{Na}$ : 433.18920; Found: 433.18954.

### 3,3'-(5-(Propan-2-ylidene)cyclopent-3-ene-1,2-diyl)bis(1H-indole). (4ea)

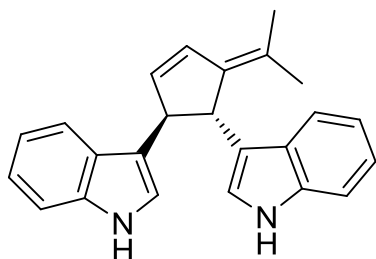

Yield: 64%; colourless viscous liquid;  $R_f$ : 0.45 (hexane/ethyl acetate = 3:1). **IR** (Neat)  $\nu_{\max}$ : 3315, 2920, 2857, 2377, 1648, 1590, 1520, 1468, 1367, 1160, 1119, 1037  $\text{cm}^{-1}$ .  **$^1\text{H NMR}$**  (500 MHz,  $\text{CDCl}_3$ , TMS):  $\delta$  7.99 (s, 1H), 7.92 (s, 1H), 7.60-7.56 (m, 2H), 7.40- 7.37 (m, 2H), 7.23-7.18 (m, 3H), 7.09-7.05 (m, 3H), 7.00 (s, 1H), 6.94 (s, 1H), 6.74 (dd, 1H,  $J_1 = 5.5\text{Hz}$ ,  $J_2 = 2\text{Hz}$ ), 6.05 (dd, 1H,  $J_1 = 5.5\text{Hz}$ ,  $J_2 = 2.5\text{Hz}$ ), 4.28 (s, 1H), 4.22 (s, 1H), 1.93 (s, 3H), 1.61 (s, 3H).  **$^{13}\text{C NMR}$**  (125 MHz,  $\text{CDCl}_3$ , TMS):  $\delta$  141.9, 137.1, 136.9, 135.8, 130.4, 127.3, 126.8, 125.8, 125.7, 124.4, 121.5, 121.3, 120.5, 120.3, 120.0, 118.4, 118.2, 117.9, 110.8, 110.7, 52.4, 46.4, 21.3

**HRMS (ESI)**: Calcd for  $\text{C}_{24}\text{H}_{22}\text{N}_2\text{Na}$ : 361.16807; Found: 361.16848

### 3,3'-(5-(Propan-2-ylidene)cyclopent-3-ene-1,2-diyl)bis(1-methyl-1H-indole). (4eb)

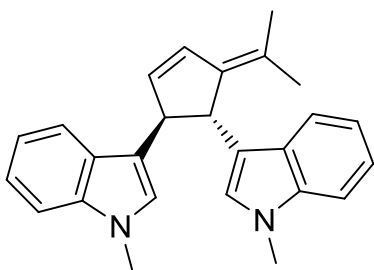

Yield: 56%; pale yellow solid, M. p. 162–164°C;  $R_f$ : 0.50 (hexane/ethyl acetate = 3:1). **IR** (Neat)  $\nu_{\max}$ : 2925, 2852, 2371, 1649, 1586, 1523, 1465, 1364, 1254, 1167, 1122, 1042  $\text{cm}^{-1}$ .  **$^1\text{H}$  NMR** (500 MHz,  $\text{CDCl}_3$ , TMS):  $\delta$  7.66–7.61 (m, 2H), 7.38–7.31 (m, 2H), 7.29–7.27 (m, 2H), 7.14–7.09 (m, 2H), 6.90 (s, 1H), 6.83 (s, 1H), 6.78 (dd, 1H,  $J_1 = 5.5\text{Hz}$ ,  $J_2 = 2\text{Hz}$ ), 6.09 (dd, 1H,  $J_1 = 5.5\text{Hz}$ ,  $J_2 = 2.5\text{Hz}$ ), 4.32 (s, 1H), 4.25 (s, 1H), 3.81 (s, 3H), 3.79 (s, 3H), 1.99 (s, 3H), 1.60 (s, 3H).  **$^{13}\text{C}$  NMR** (125 MHz,  $\text{CDCl}_3$ , TMS):  $\delta$  142.2, 137.6, 137.5, 135.9, 130.5, 127.1, 127.0, 125.9, 125.7, 124.4, 121.5, 121.3, 120.3, 120.2, 119.9, 118.8, 118.7, 118.4, 109.2, 109.1, 52.6, 46.6, 31.7, 21.4.

**HRMS (ESI)**: Calcd for  $\text{C}_{26}\text{H}_{26}\text{N}_2\text{Na}$ : 389.19937; Found: 389.19969.

### 3,3'-(5-Cycloheptylidencyclopent-3-ene-1,2-diyl)bis(1H-indole). (4fa)

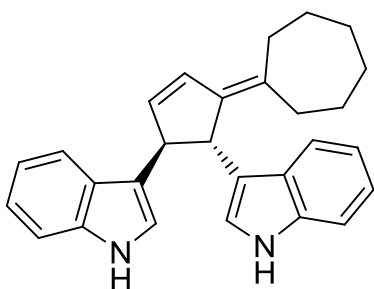

Yield: 53%; colourless viscous liquid;  $R_f$ : 0.43 (hexane/ethyl acetate = 3:1). **IR** (Neat)  $\nu_{\max}$ : 3408, 3056, 2923, 2853, 1703, 1619, 1583, 1517, 1485, 1455, 1338, 1227, 1095, 1012, 741  $\text{cm}^{-1}$ .  **$^1\text{H}$  NMR** (500 MHz,  $\text{CDCl}_3$ , TMS):  $\delta$  7.97 (s, 1H), 7.89 (s, 1H), 7.59–7.57 (d,  $J = 8\text{Hz}$ , 2H), 7.37–7.34 (m, 2H), 7.21–7.16 (m, 2H), 7.07–7.05 (m, 2H), 6.98–6.93 (m, 2H), 6.76 (dd,  $J_1 = 5.5\text{Hz}$ ,  $J_2 = 2.5\text{Hz}$ , 1H), 6.04 (dd,  $J_1 = 5.5\text{Hz}$ ,  $J_2 = 3\text{Hz}$ , 1H), 4.27 (s, 1H), 4.18 (brs, 1H), 2.57–2.51 (m, 2H), 2.25–2.19 (m, 1H), 2.07–2.06 (m, 1H), 1.72–1.29 (m, 8H).  **$^{13}\text{C}$  NMR** (125 MHz,  $\text{CDCl}_3$ , TMS):  $\delta$  142.1, 136.9, 136.7, 135.9, 134.3, 130.4, 129.0, 128.2, 126.7, 126.6, 121.9, 121.5, 120.8, 120.7, 120.2, 120.1, 119.2, 119.0, 111.0, 110.9, 52.5, 46.1, 32.8, 32.5, 29.8, 28.8, 27.2, 26.9.

**HRMS (ESI)**: Calcd for  $\text{C}_{28}\text{H}_{28}\text{N}_2\text{Na}$ : 415.21502; Found: 415.21538.

Compound **4ga**

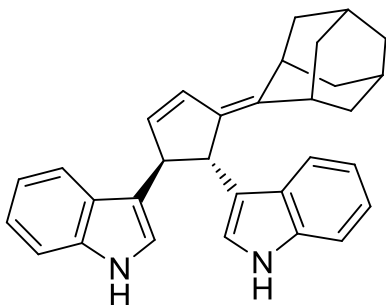

Yield: 58%; colourless viscous liquid;  $R_f$ : 0.43 (hexane/ethyl acetate = 3:1). **IR** (Neat)  $\nu_{\max}$ : 3289, 3066, 2931, 2857, 1668, 1620, 1582, 1520, 1455, 1304, 1238, 933, 744  $\text{cm}^{-1}$ .  **$^1\text{H NMR}$**  (500 MHz,  $\text{CDCl}_3$ , TMS):  $\delta$  7.88 (s, 1H), 7.79 (s, 1H), 7.62 (d,  $J = 8\text{Hz}$ , 1H), 7.55 (d,  $J = 8\text{Hz}$ , 1H), 7.54-7.21 (m, 2H), 7.19-7.13 (m, 2H), 7.05- 6.93 (m, 4H), 6.72-6.71 (m, 1H), 5.94 (dd,  $J_1 = 5.5\text{Hz}$ ,  $J_2 = 3\text{Hz}$ , 1H), 4.30 (s, 1H), 4.11 (brs, 1H), 3.12 (brs, 1H), 2.49 (brs, 1H), 2.04-1.68 (m, 9H), 1.53-1.43 (m, 2H), 0.88-0.84 (m, 1H).  **$^{13}\text{C NMR}$**  (125 MHz,  $\text{CDCl}_3$ , TMS):  $\delta$  140.8, 137.8, 137.0, 136.9, 135.4, 135.2, 129.5, 129.1, 128.3, 126.8, 126.5, 125.4, 122.0, 121.8, 120.9, 120.4, 119.2, 118.9, 111.2, 111.1, 52.4, 45.2, 39.8, 39.4, 38.2, 37.3, 35.1, 34.8, 28.4, 21.6.

**HRMS (ESI)**: Calcd for  $\text{C}_{31}\text{H}_{30}\text{N}_2\text{Na}$ : 453.23067; Found: 453.23101.

#### Compound 4gb

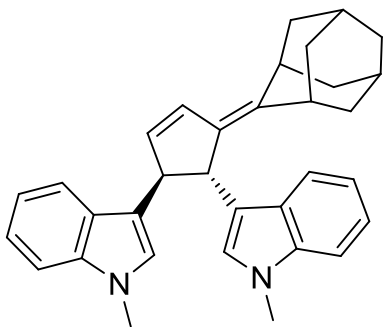

Yield: 55%; colourless viscous liquid;  $R_f$ : 0.48 (hexane/ethyl acetate = 3:1). **IR** (Neat)  $\nu_{\max}$ : 3090, 2950, 2932, 2857, 1688, 1621, 1583, 1514, 1462, 1380, 1304, 1238, 1108, 1042, 957, 931, 743  $\text{cm}^{-1}$ .  **$^1\text{H NMR}$**  (500 MHz,  $\text{CDCl}_3$ , TMS):  $\delta$  7.65 (d,  $J = 8\text{Hz}$ , 1H), 7.58 (d,  $J = 8\text{Hz}$ , 1H), 7.33-7.20 (m, 6H), 7.08-7.02 (m, 2H), 6.89 (s, 1H), 6.83 (s, 1H), 6.73 (d,  $J = 5.5\text{Hz}$ , 1H), 5.95 (t,  $J = 2.5\text{Hz}$ , 1H), 4.32 (s, 1H), 4.13 (s, 1H), 3.81 (s, 3H), 3.77 (s, 3H), 3.17 (s, 1H), 2.53 (s, 1H), 2.01-1.58 (m, 12H).  **$^{13}\text{C NMR}$**  (125 MHz,  $\text{CDCl}_3$ , TMS):  $\delta$  140.6, 137.6, 135.6, 135.2, 129.2, 127.2, 127.0, 125.6, 125.5, 121.5, 120.5, 120.3, 118.8, 118.8, 118.6, 109.1, 108.9, 52.5, 45.2, 39.8, 39.3, 38.2, 37.3, 35.0, 34.4, 32.6, 32.5, 28.4, 28.3.

**HRMS (ESI)**: Calcd for  $\text{C}_{33}\text{H}_{34}\text{N}_2\text{Na}$ : 481.26197; Found: 481.26141

#### Compound 4gc



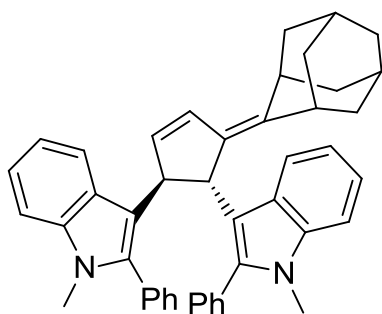

Yield: 74%; colourless viscous liquid;  $R_f$ : 0.55 (hexane/ethyl acetate = 3:1). **IR** (Neat)  $\nu_{\max}$ : 2981, 2915, 2833, 1671, 1621, 1586, 1542, 1380, 1300, 1238, 1042, 957, 931, 743  $\text{cm}^{-1}$ .  **$^1\text{H}$  NMR** (500 MHz,  $\text{CDCl}_3$ , TMS):  $\delta$  7.62-7.47 (m, 6H), 7.38-6.96 (m, 12H), 6.66 (dd,  $J_1=5.5$  Hz,  $J_2=2.5$  Hz, 1H), 6.04 (dd,  $J_1=5.5$  Hz,  $J_2=2.5$  Hz, 1H), 4.41 (brs, 1H), 4.22 (brs, 1H), 3.61 (s, 3H), 3.57 (s, 3H), 2.98 (brs, 1H), 2.32 (brs, 1H), 1.83-1.50 (m, 12H).  **$^{13}\text{C}$  NMR** (125 MHz,  $\text{CDCl}_3$ , TMS):  $\delta$  140.2, 137.9, 137.4, 136.2, 135.8, 134.6, 133.9, 133.4, 131.3, 130.5, 129.7, 128.7, 128.2, 127.7, 127.5, 126.6, 125.3, 122.3, 121.4, 120.3, 119.5, 119.1, 119.0, 117.5, 115.2, 108.9, 108.7, 51.0, 45.3, 39.3, 38.9, 37.8, 37.4, 34.9, 33.1, 30.9, 28.1.

**HRMS (ESI)**: Calcd for  $\text{C}_{45}\text{H}_{42}\text{N}_2\text{Na}$ : 633.32457; Found: 633.32486.

### 3,3'-(5-(Diphenylmethylene)cyclopent-3-ene-1,2-diyl)bis(1H-indole). **4ha**

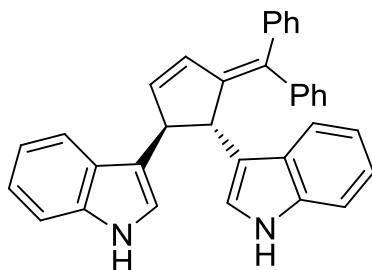

Yield: 84%; pale yellow solid, M.p. 154-156 $^{\circ}\text{C}$ ;  $R_f$ : 0.43 (hexane/ethyl acetate = 3:1). **IR** (Neat)  $\nu_{\max}$ : 3294, 2857, 2366, 2335, 1647, 1590, 1369, 1120, 1037, 702  $\text{cm}^{-1}$ .  **$^1\text{H}$  NMR** (500 MHz,  $\text{CDCl}_3$ , TMS):  $\delta$  7.90 (s, 1H), 7.67-7.51 (m, 3H), 7.37-7.06 (m, 9H), 6.98-6.78 (m, 9H), 6.40 (d,  $J = 4$  Hz, 1H), 6.24 (brs, 1H), 4.51-4.49 (m, 2H).  **$^{13}\text{C}$  NMR** (125 MHz,  $\text{CDCl}_3$ , TMS):  $\delta$  148.1, 143.2, 142.6, 140.4, 136.8, 136.5, 135.0, 133.1, 129.8, 129.3, 127.9, 127.4, 126.7, 126.5, 126.2, 125.9, 122.0, 121.5, 120.8, 120.1, 119.8, 119.5, 119.3, 119.0, 118.9, 111.1, 110.9, 57.7, 48.5.

**HRMS (ESI)**: Calcd for  $\text{C}_{34}\text{H}_{26}\text{N}_2\text{Na}$ : 485.19937; Found: 485.19969.

### 3,3'-(5-(Diphenylmethylene)cyclopent-3-ene-1,2-diyl)bis(1-methyl-1H-indole). (**4hb**)

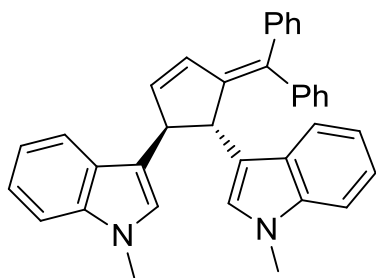

Yield: 81%; yellow solid, M.p. 160-162°C;  $R_f$ : 0.48 (hexane/ethyl acetate = 3:1). **IR** (Neat)  $\nu_{\max}$ : 3053, 2927, 1709, 1688, 1613, 1513, 1469, 1427, 1372, 1328, 1242, 1156, 1130, 1013, 740  $\text{cm}^{-1}$ .  **$^1\text{H}$  NMR** (500 MHz,  $\text{CDCl}_3$ , TMS):  $\delta$  7.78-7.76 (m, 2H), 7.72-7.30 (m, 9H), 7.20-6.99 (m, 6H), 6.87 (brs, 3H), 6.52 (t,  $J = 3\text{ Hz}$ , 1H), 6.09 (dd,  $J_1 = 4\text{ Hz}$ ,  $J_2 = 2.5\text{ Hz}$ , 1H), 4.66 (brs, 1H), 4.57-4.54 (m, 1H), 3.81 (s, 3H), 3.58 (s, 3H).  **$^{13}\text{C}$  NMR** (125 MHz,  $\text{CDCl}_3$ , TMS):  $\delta$  148.8, 143.3, 143.0, 140.8, 137.6, 137.3, 134.9, 132.9, 129.9, 129.3, 129.2, 128.4, 128.0, 127.4, 127.2, 127.2, 126.8, 126.5, 125.8, 125.7, 121.7, 121.1, 120.3, 120.0, 118.9, 118.4, 118.1, 117.6, 109.3, 109.1, 51.8, 48.9, 32.6, 32.2.

**MS (ESI)**: Calcd for  $\text{C}_{36}\text{H}_{30}\text{N}_2\text{Na}$ : 513.23067; Found: 513.23098.

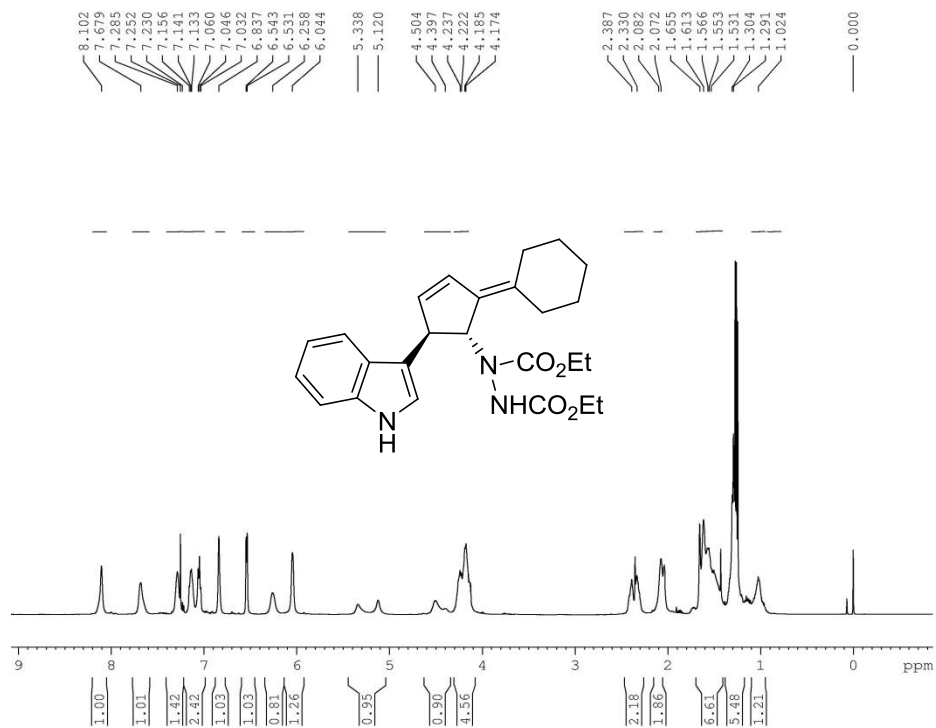

**<sup>1</sup>H NMR of 3aa**

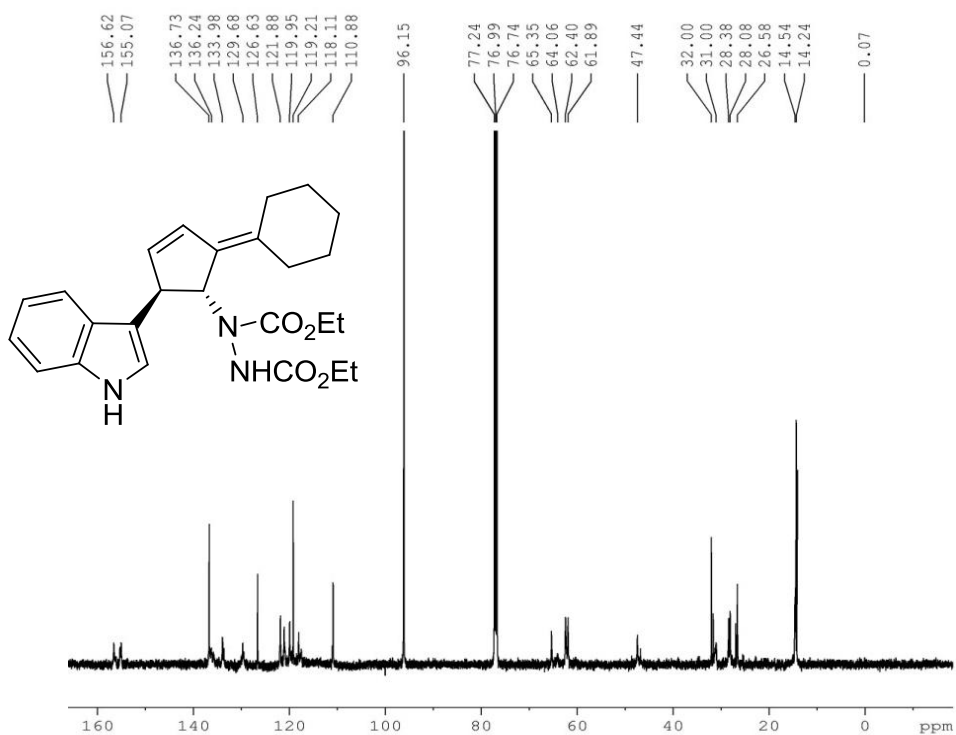

**<sup>13</sup>C NMR of 3aa**

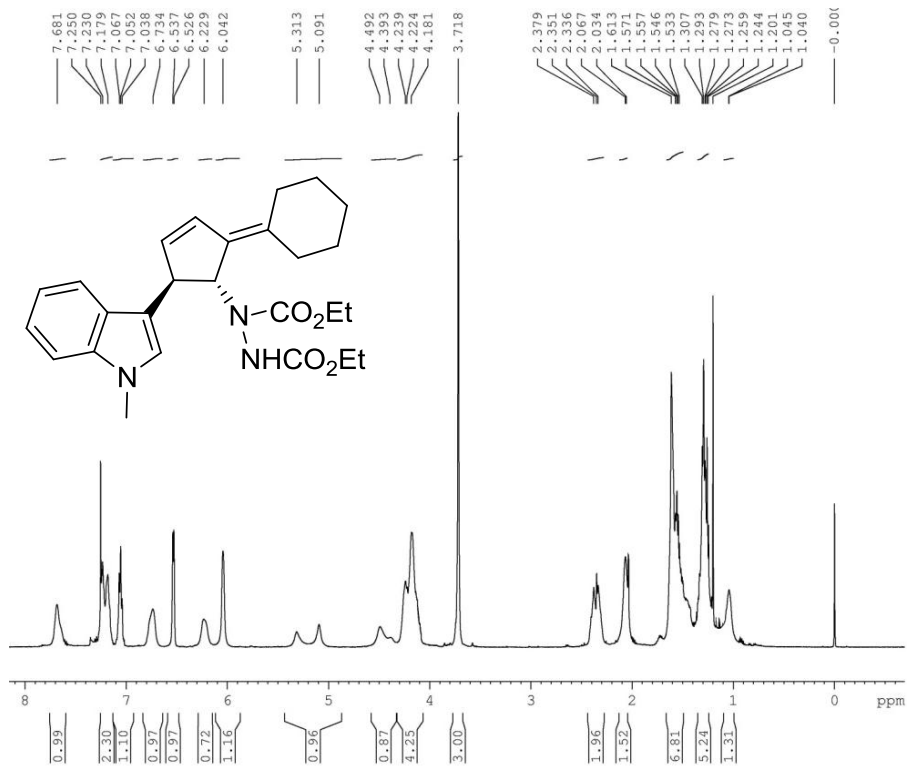

<sup>1</sup>H NMR of 3ab

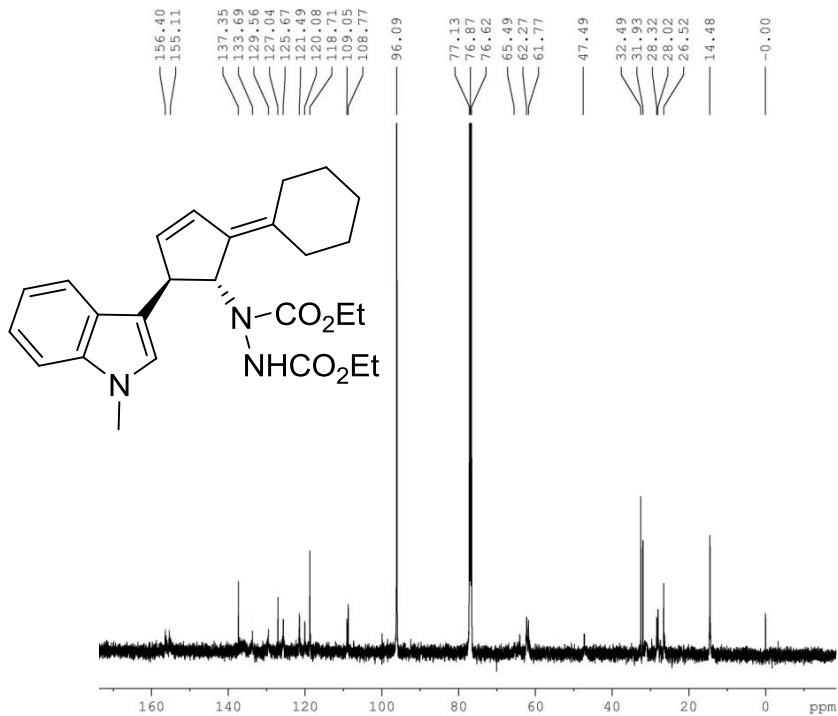

<sup>13</sup>C NMR of 3ab

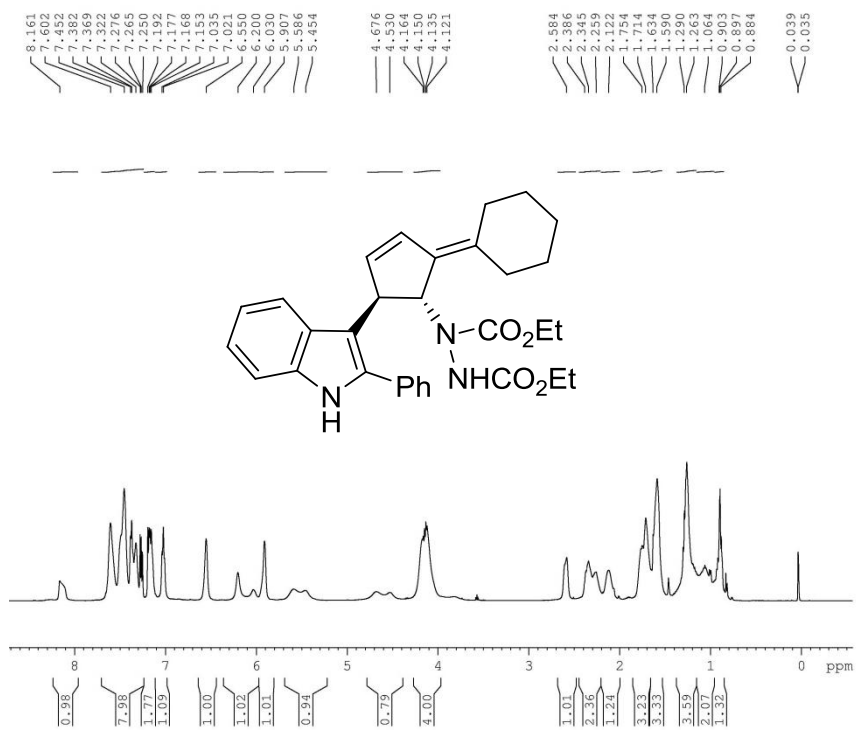

**<sup>1</sup>H NMR of 3ac**

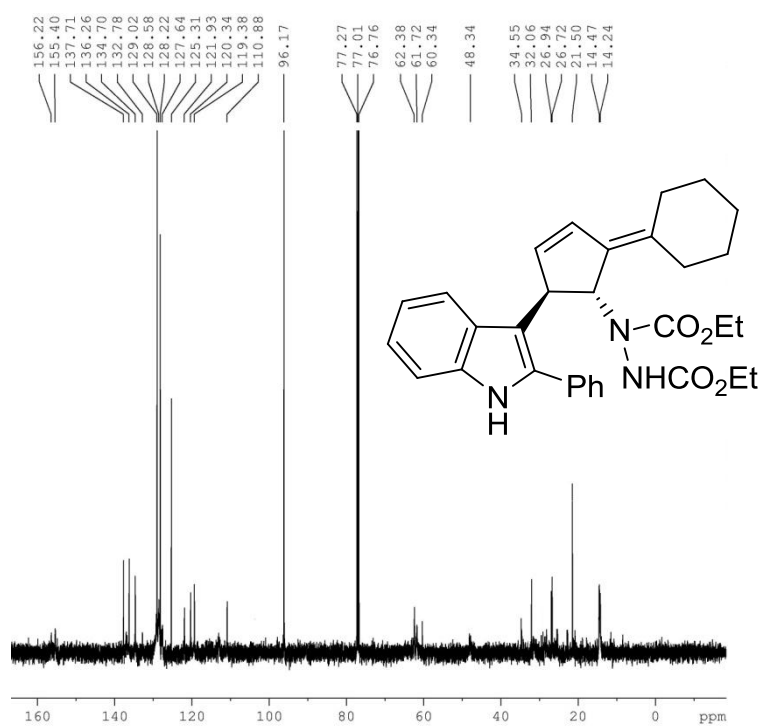

**<sup>13</sup>C NMR of 3ac**

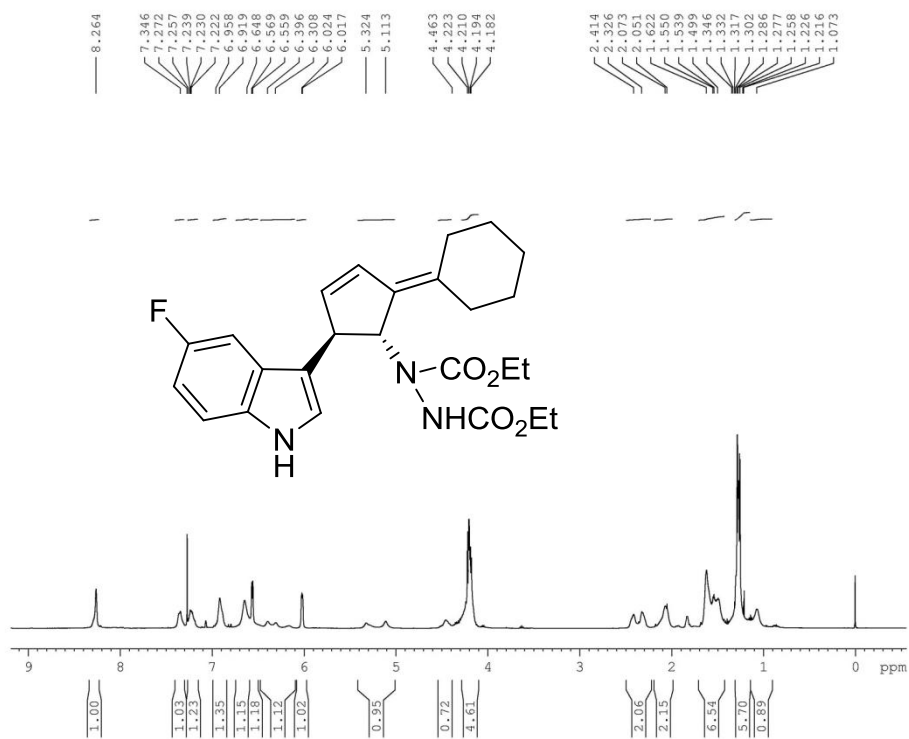

**<sup>1</sup>H NMR of 3ad**

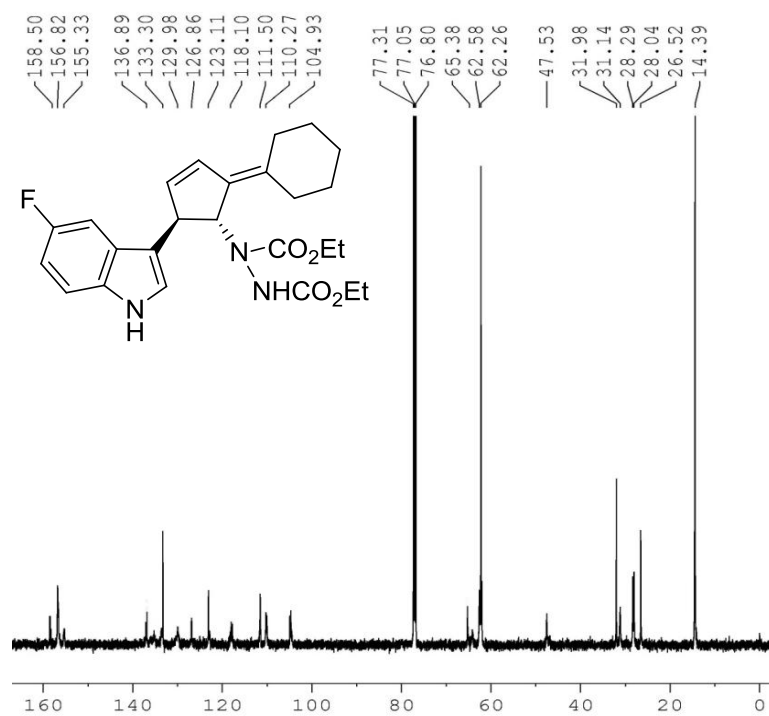

**<sup>13</sup>C NMR of 3ad**

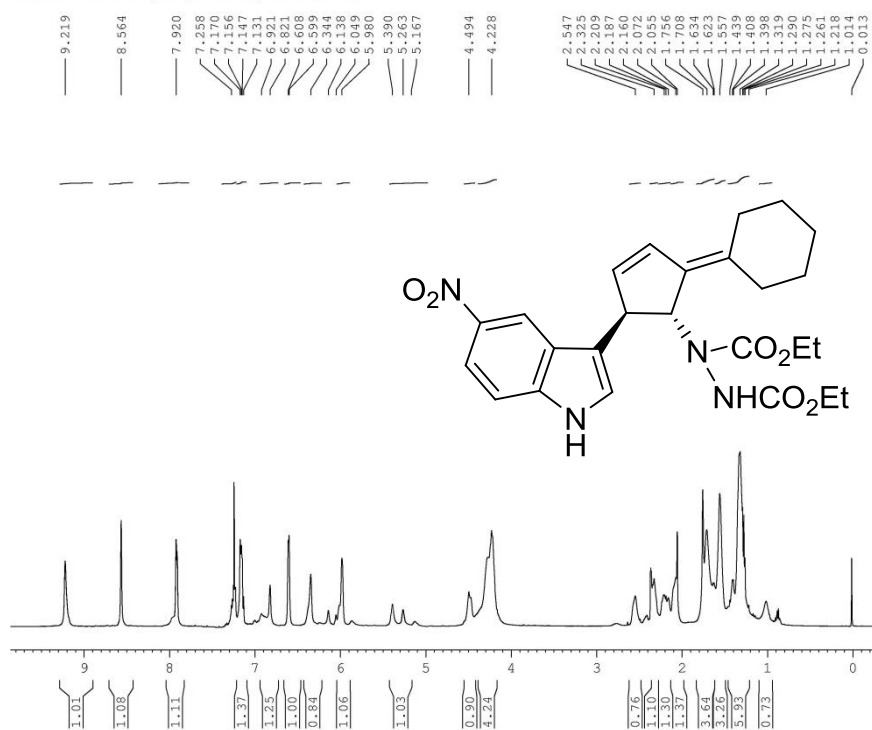

**<sup>1</sup>H NMR of 3ae**

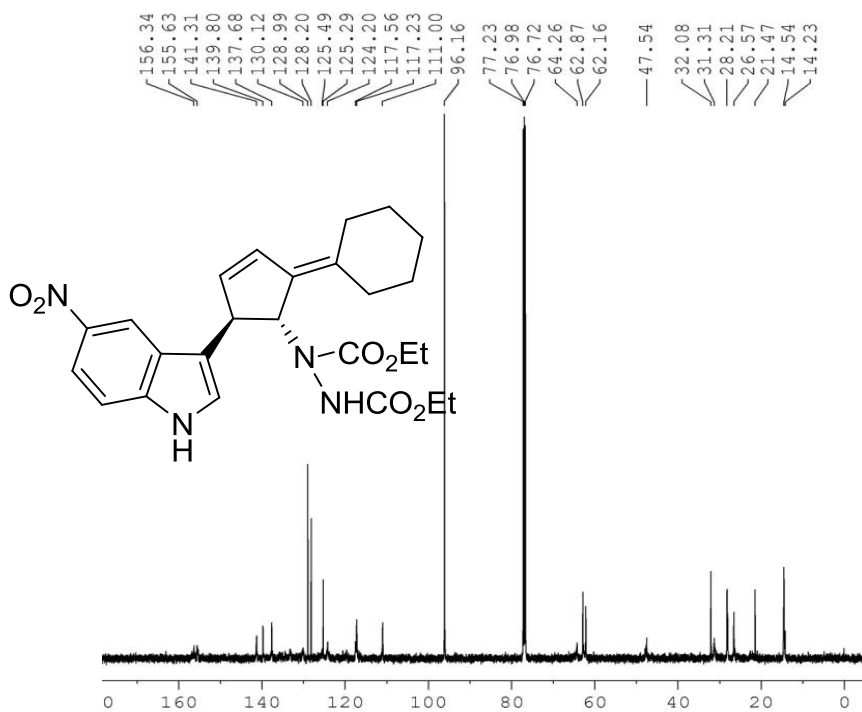

**<sup>13</sup>C NMR of 3ae**

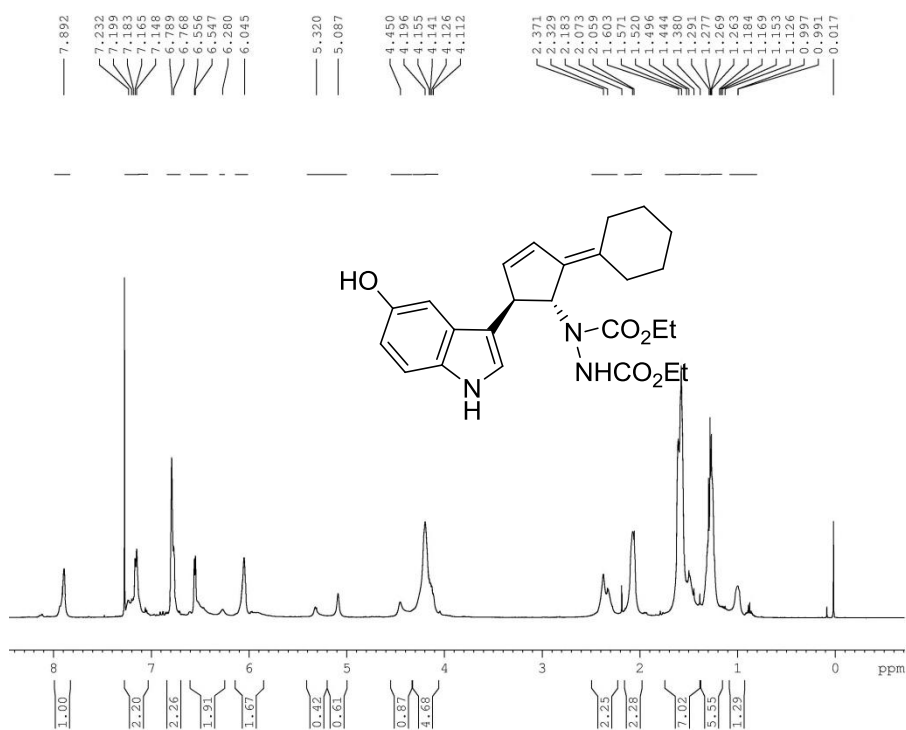

**<sup>1</sup>H NMR of 3af**

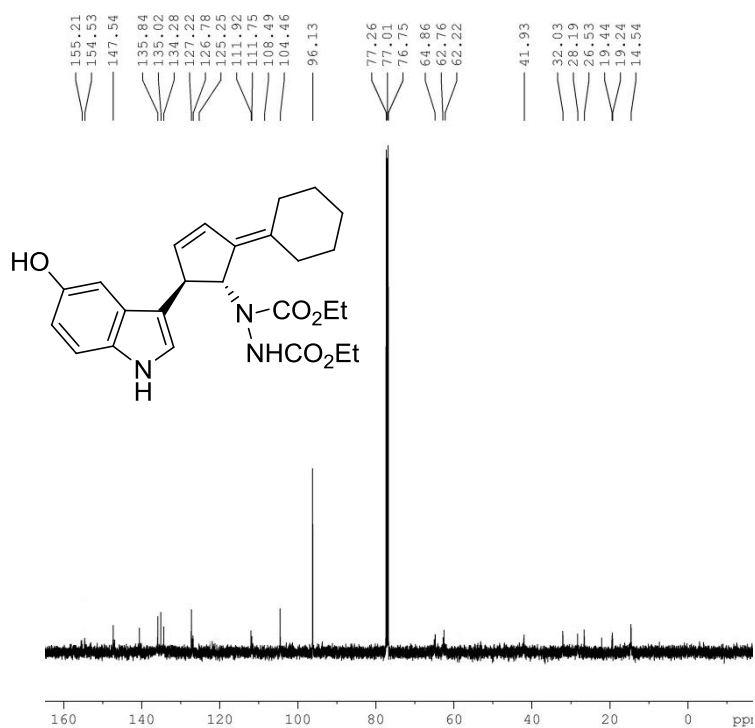

**<sup>13</sup>C NMR of 3af**



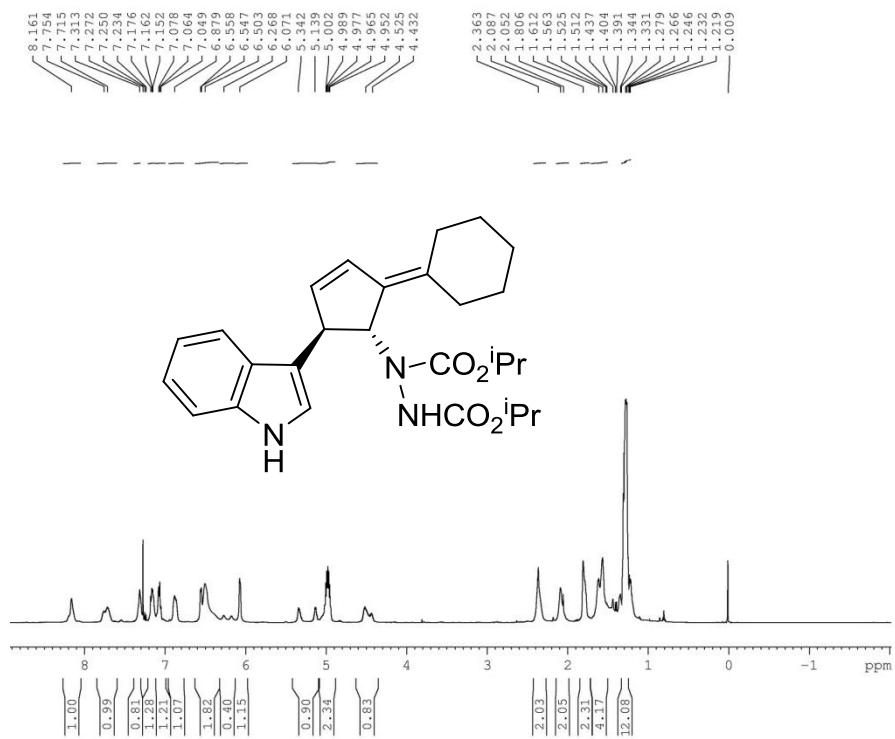

<sup>1</sup>H NMR of 3ba

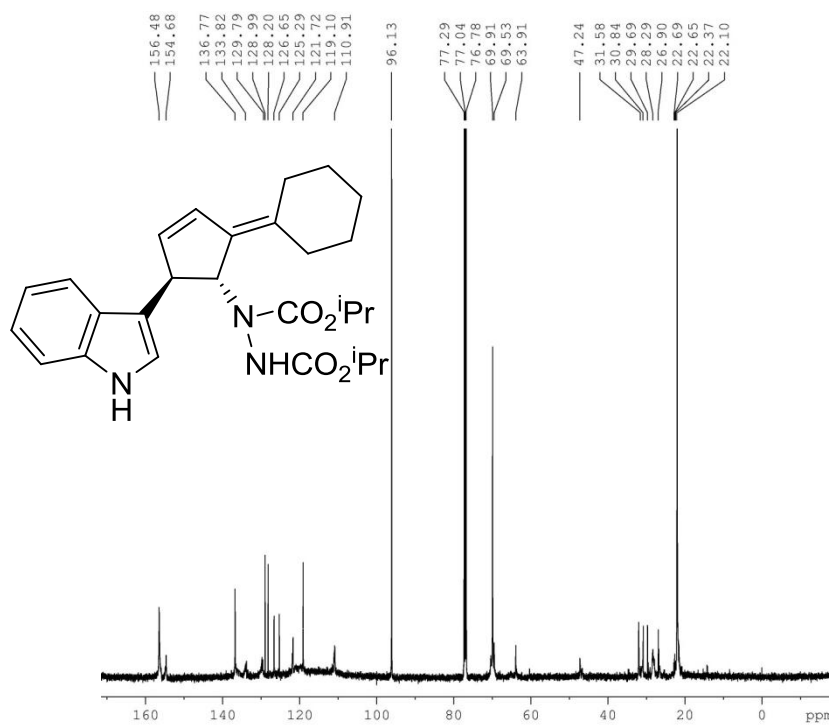

<sup>13</sup>C NMR of 3ba

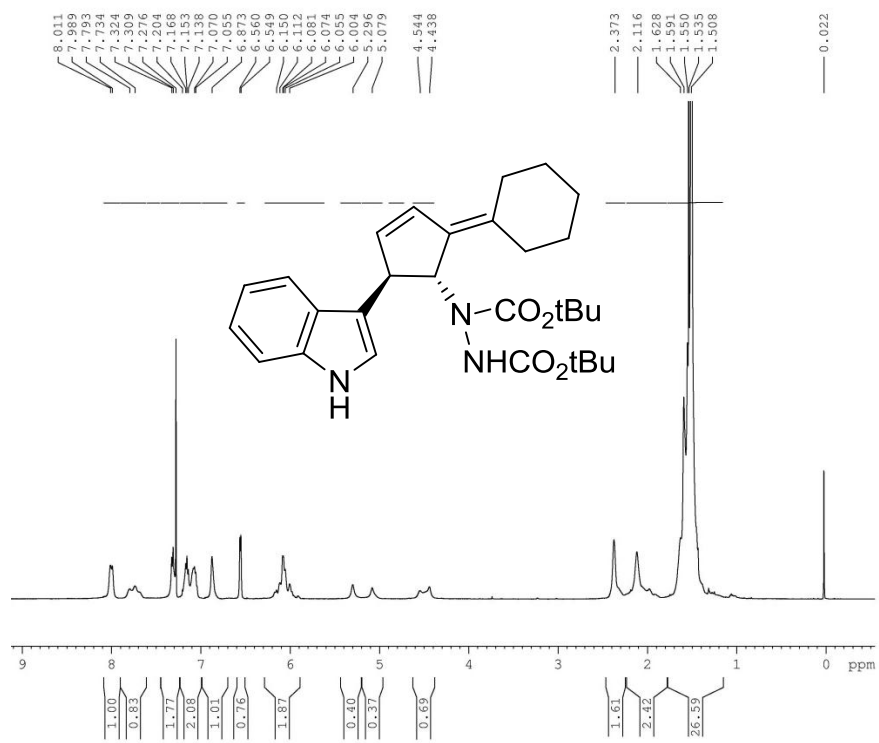

<sup>1</sup>H NMR of 3ca

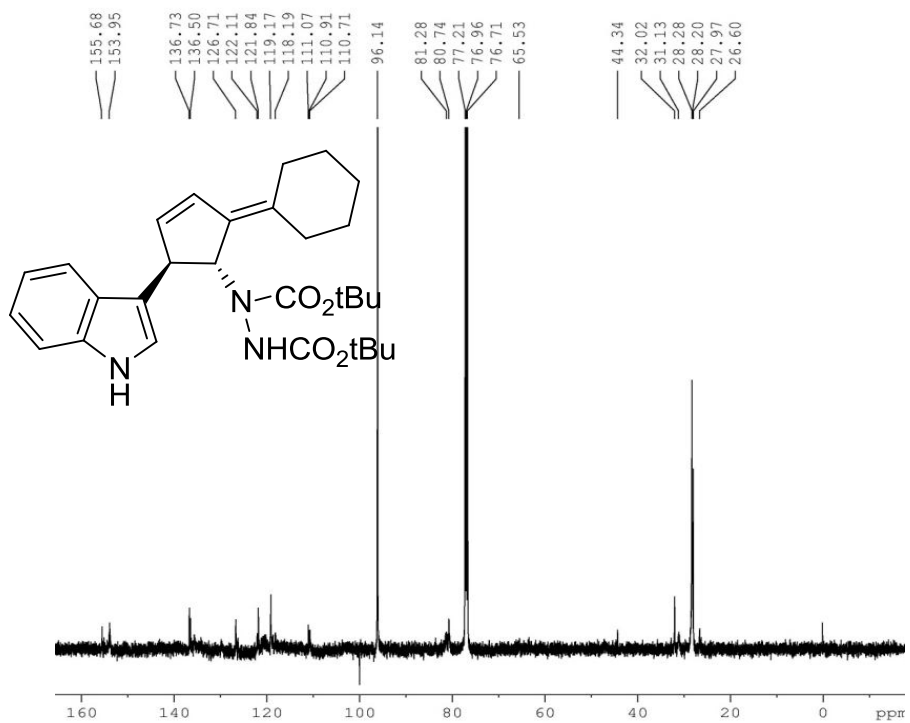

<sup>13</sup>C NMR of 3ca

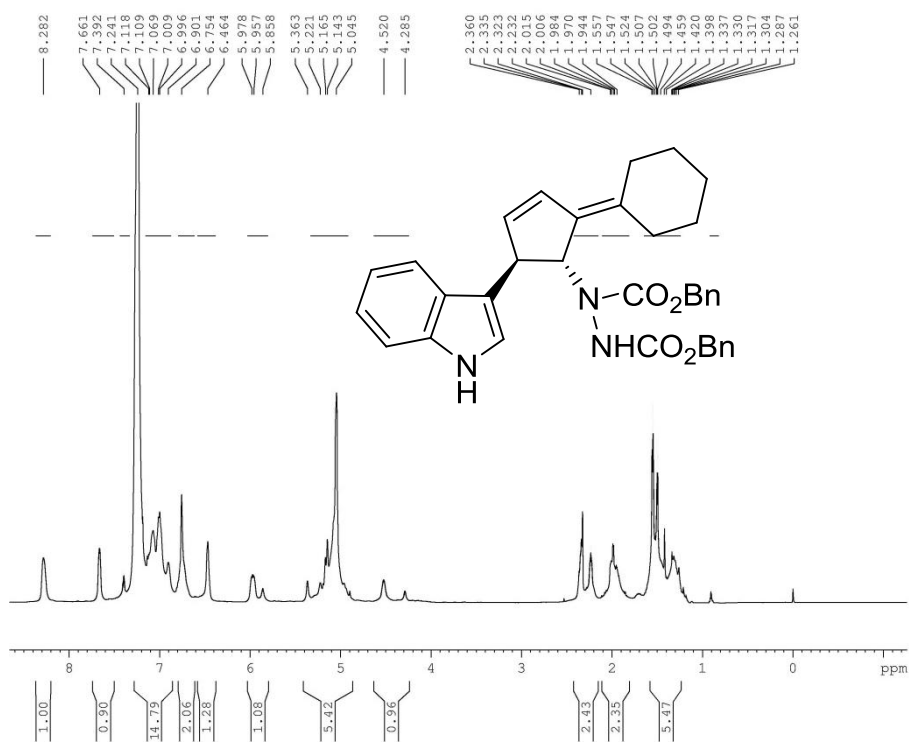

<sup>1</sup>H NMR of 3da

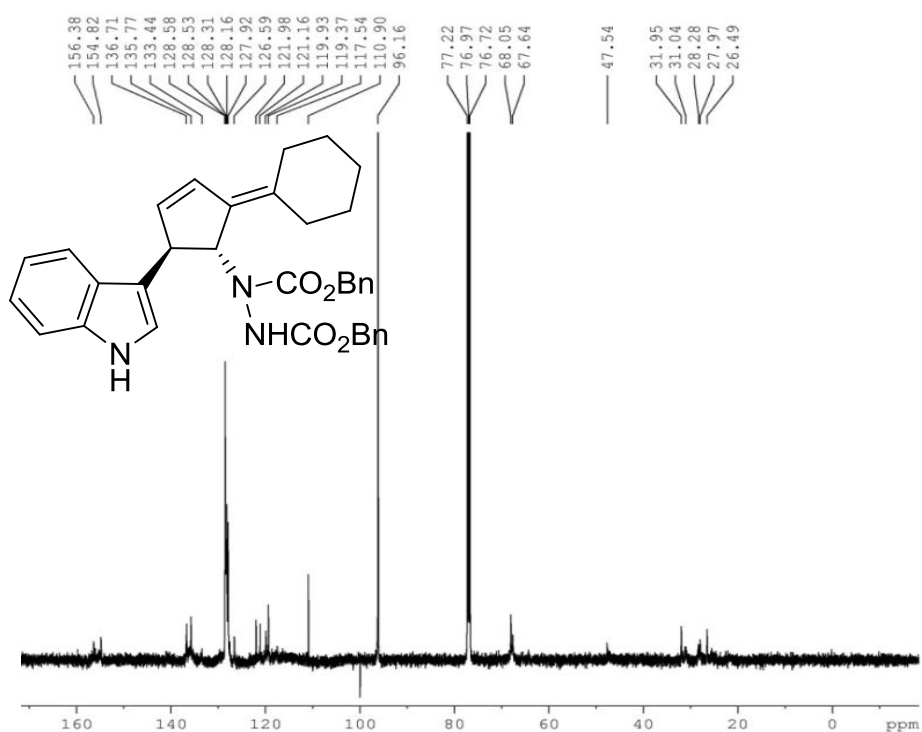

<sup>13</sup>C NMR of 3da

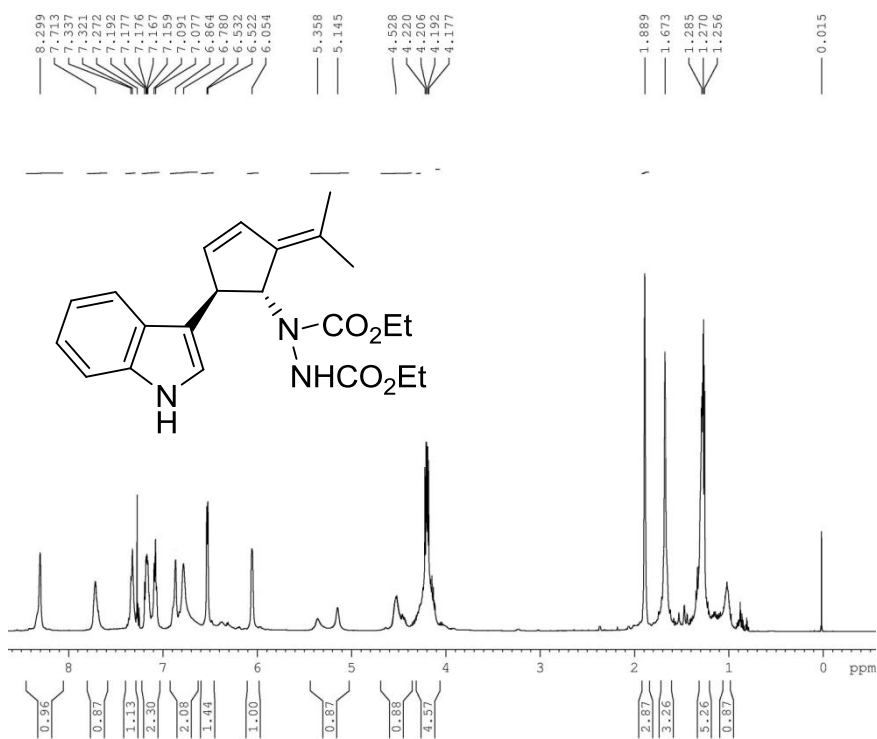

<sup>1</sup>H NMR of 3ea

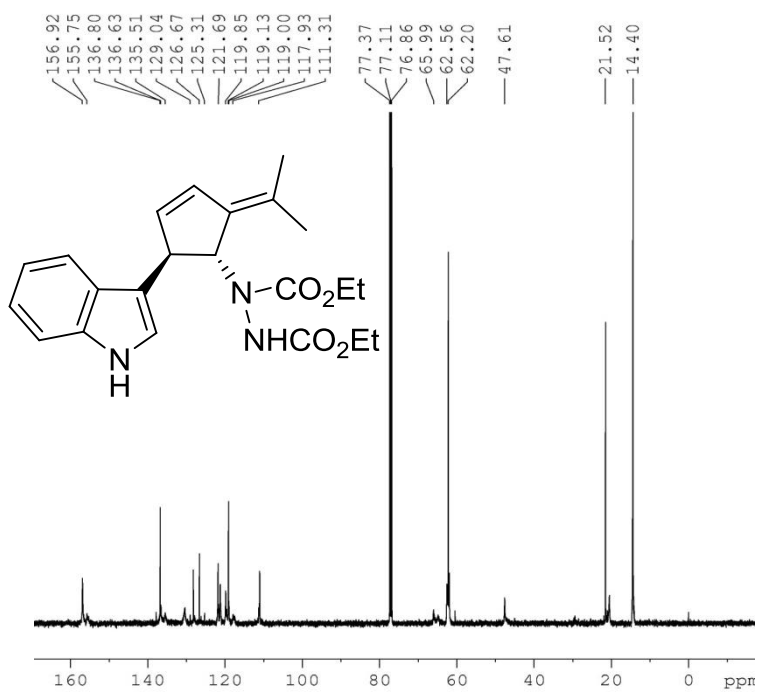

<sup>13</sup>C NMR of 3ea

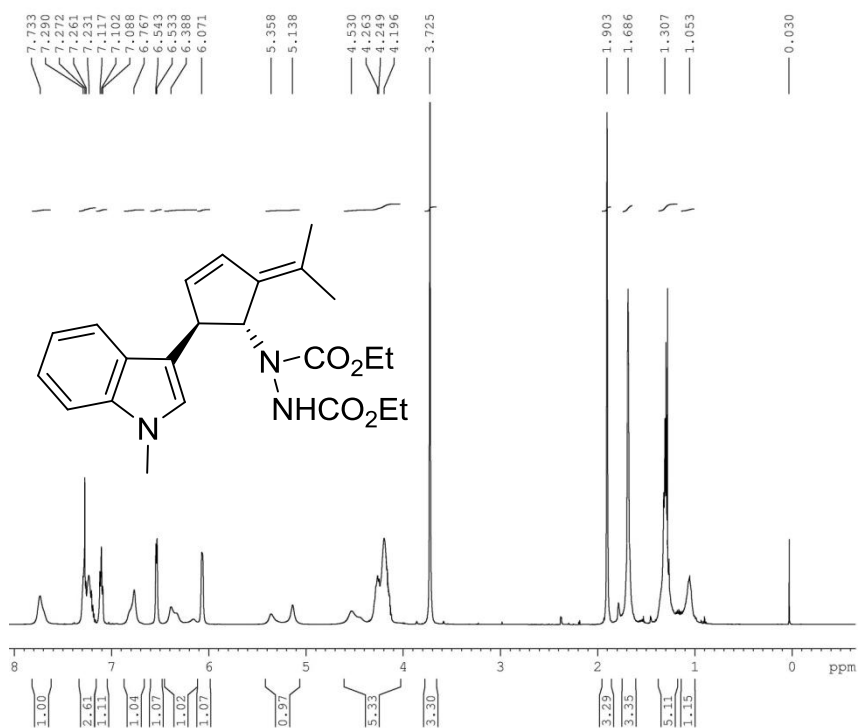

**<sup>1</sup>H NMR of 3eb**

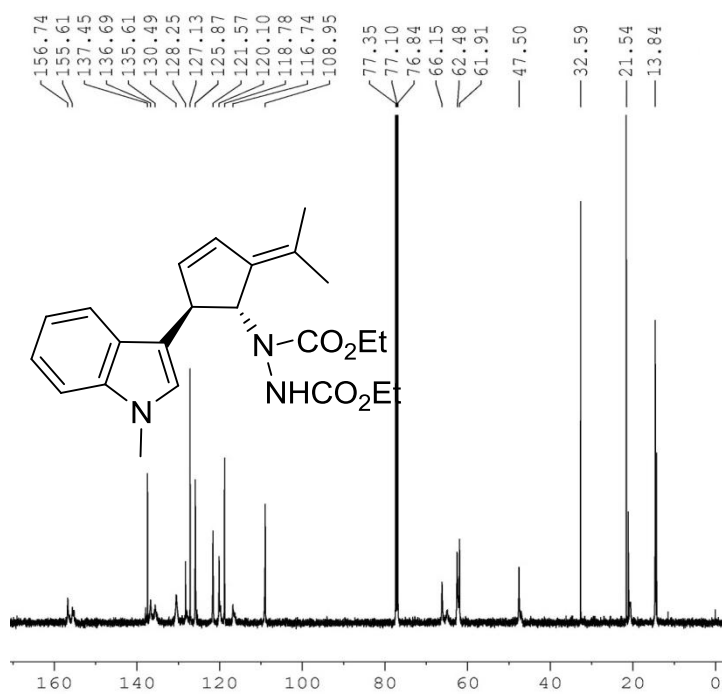

**<sup>13</sup>C NMR of 3eb**

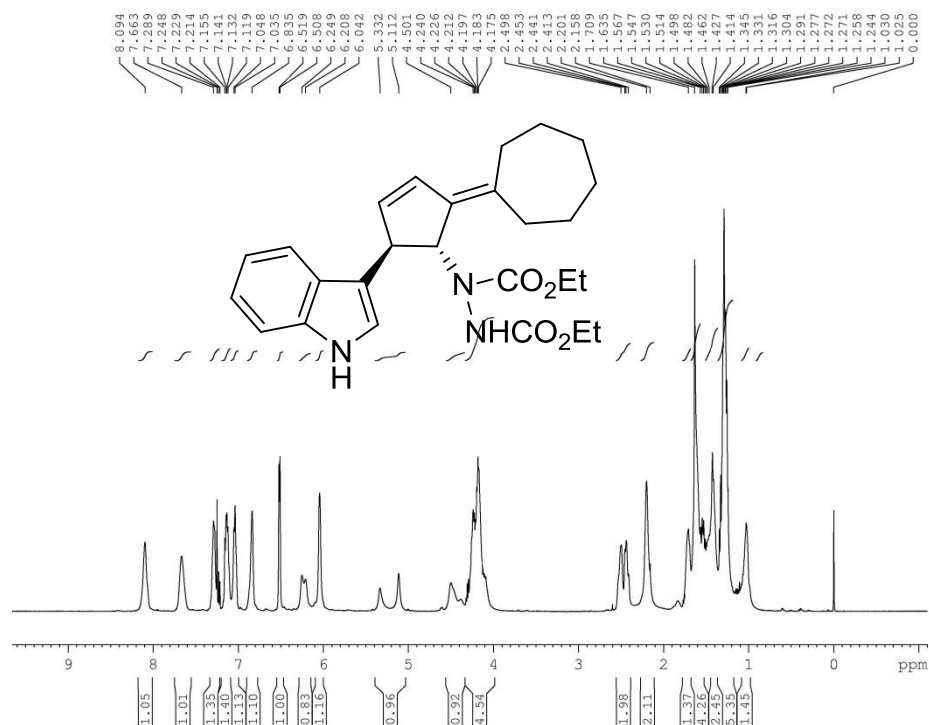

**<sup>1</sup>H NMR of 3fa**

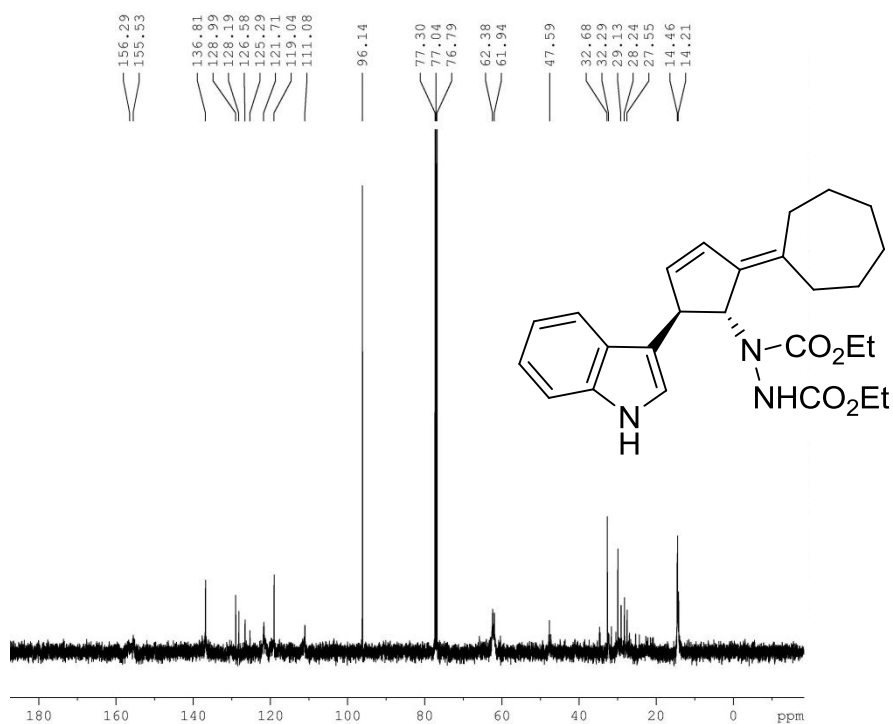

**<sup>13</sup>C NMR of 3fa**

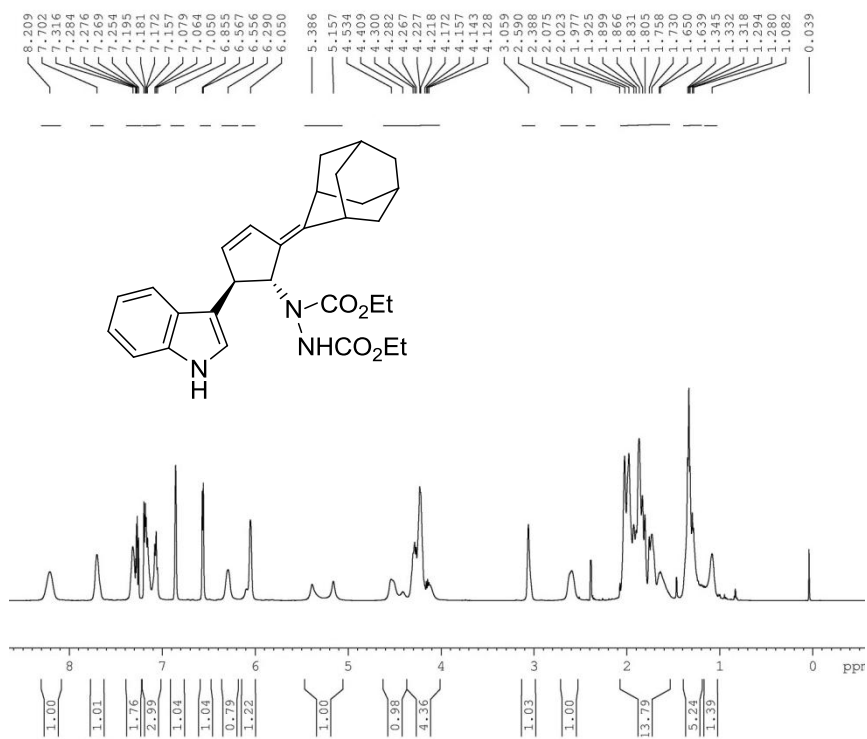

**<sup>1</sup>H NMR of 3ga**

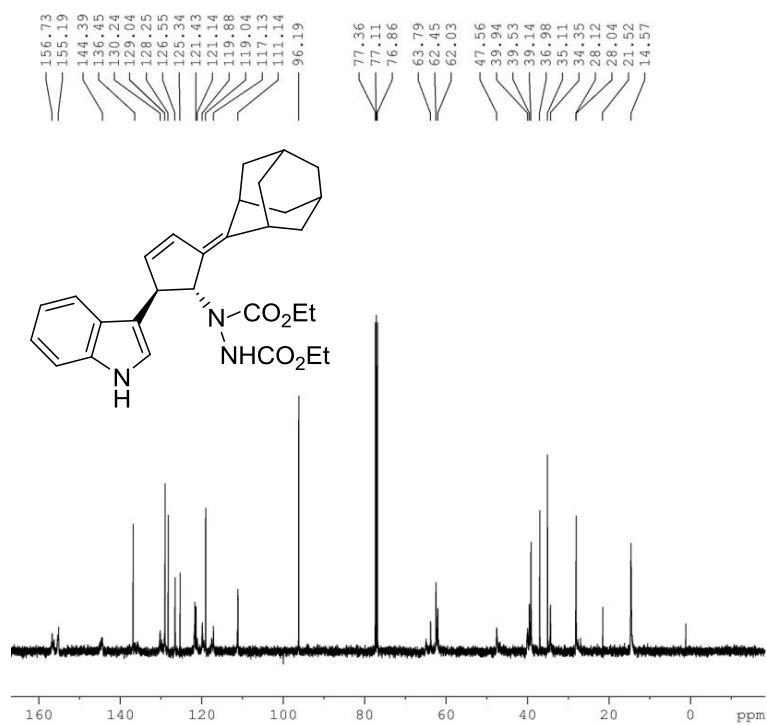

**<sup>13</sup>C NMR of 3ga**

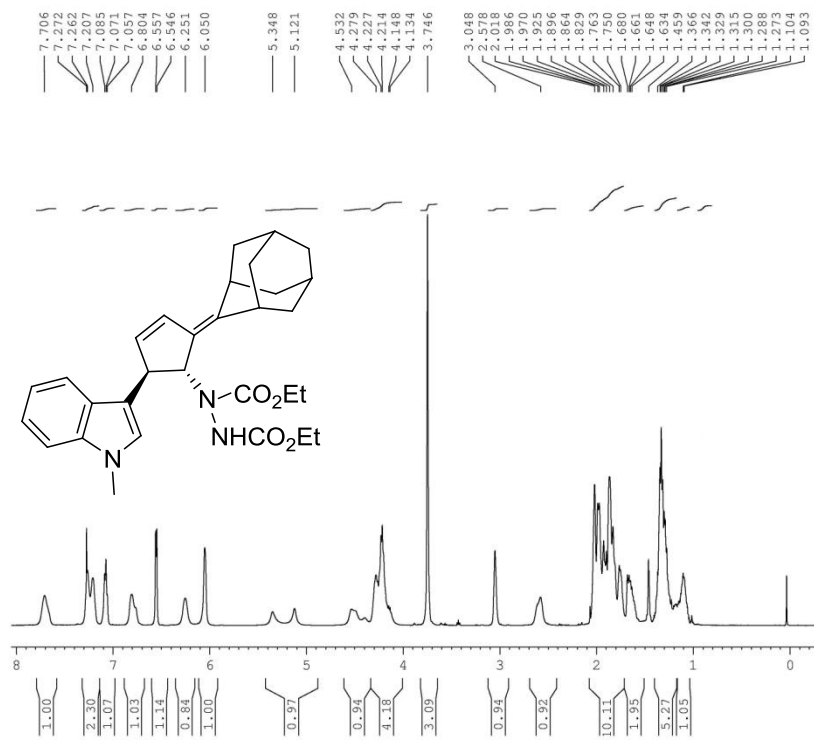

**<sup>1</sup>H NMR of 3gb**

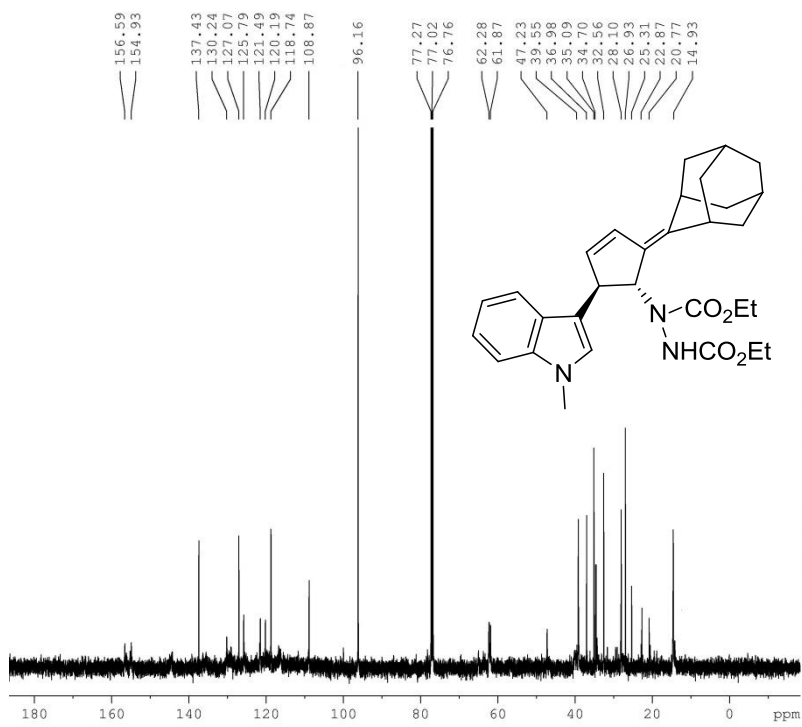

**<sup>13</sup>C NMR of 3gb**



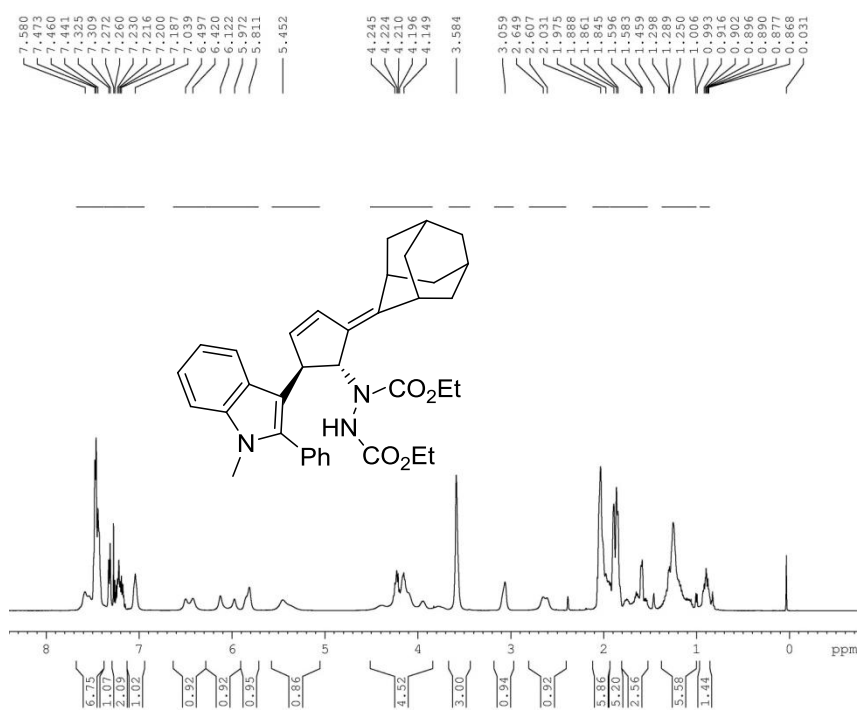

**<sup>1</sup>H NMR of 3gc**

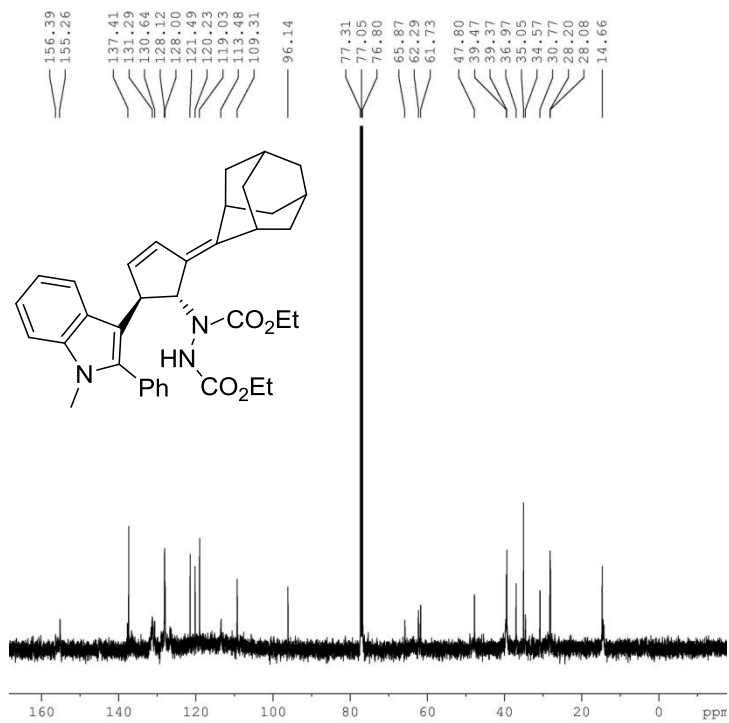

**<sup>13</sup>C NMR of 3gc**

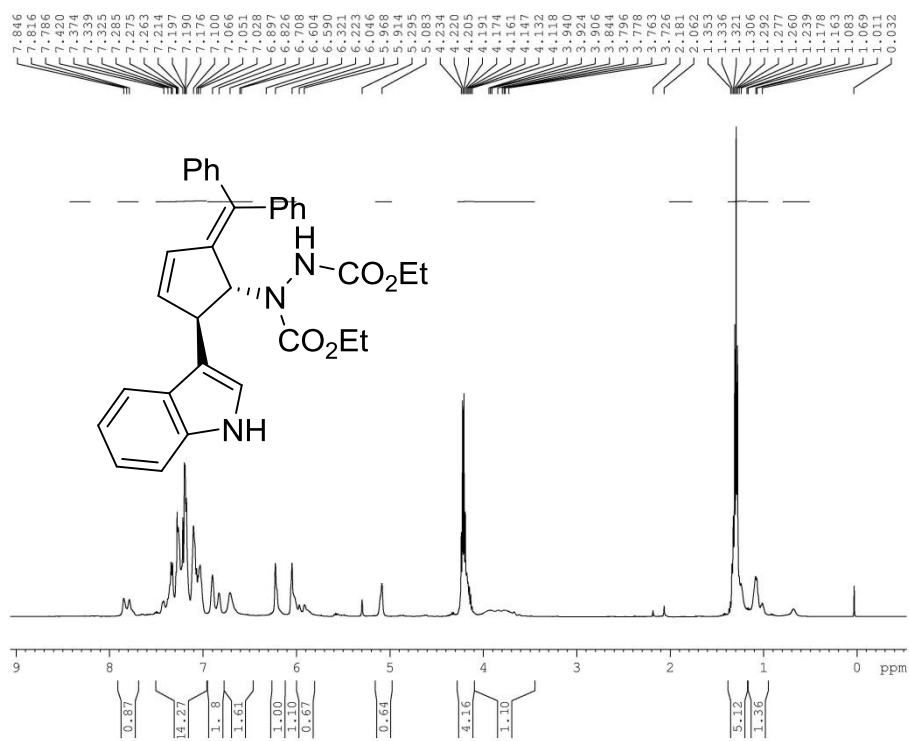

<sup>1</sup>H NMR of 3ha

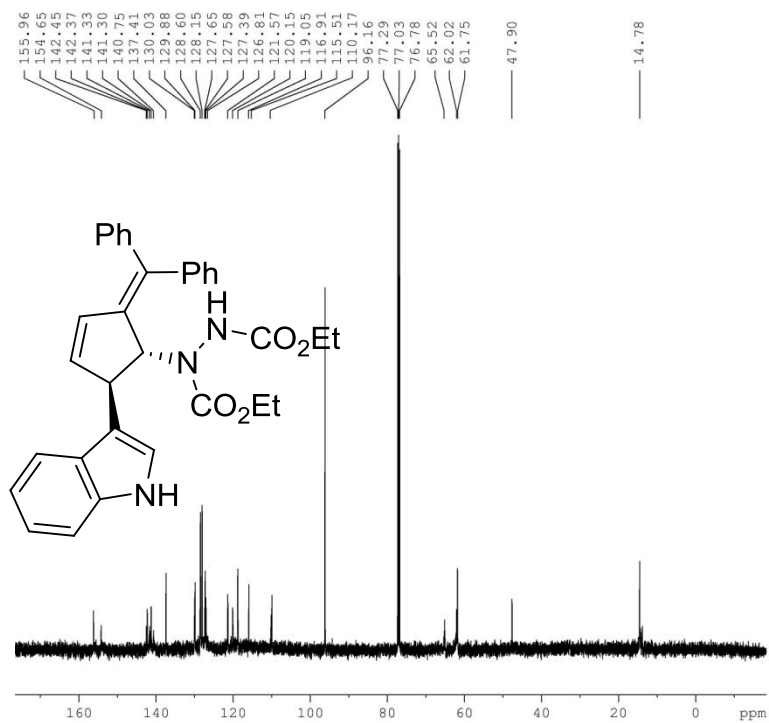

<sup>13</sup>C NMR of 3ha

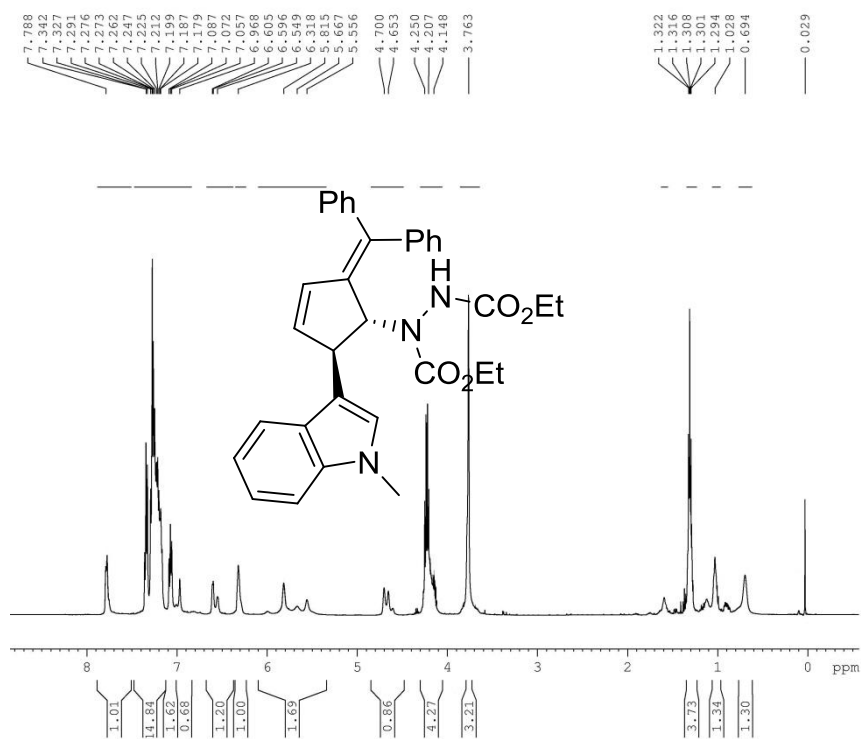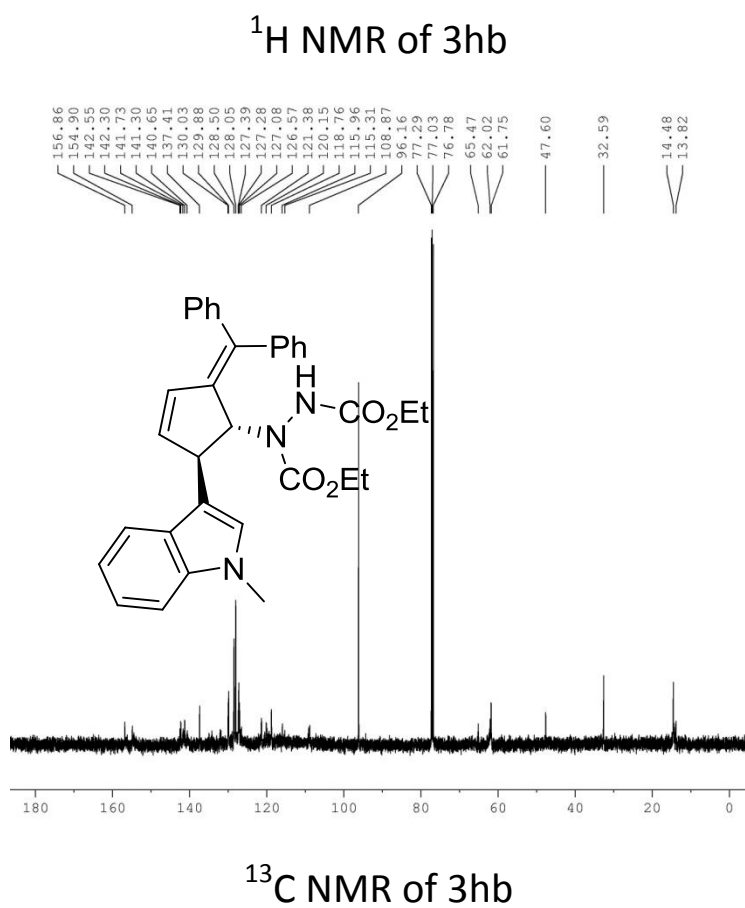

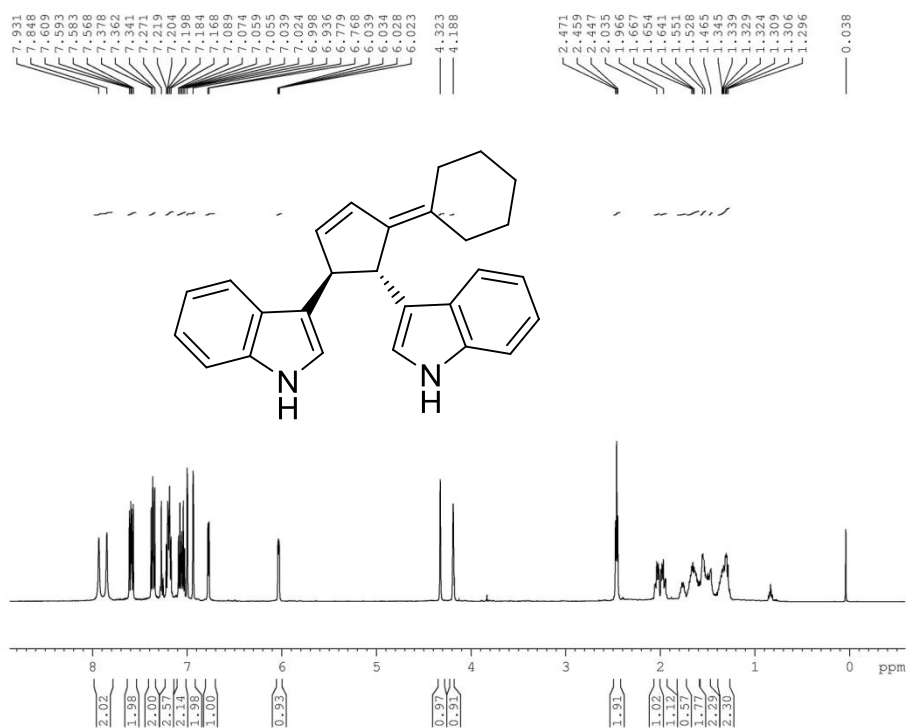

<sup>1</sup>H NMR of 4aa

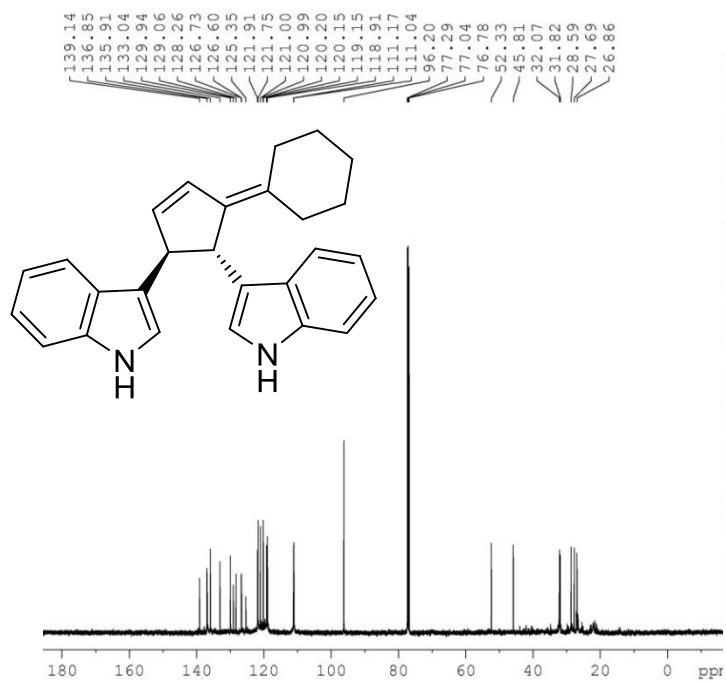

<sup>13</sup>C NMR of 4aa

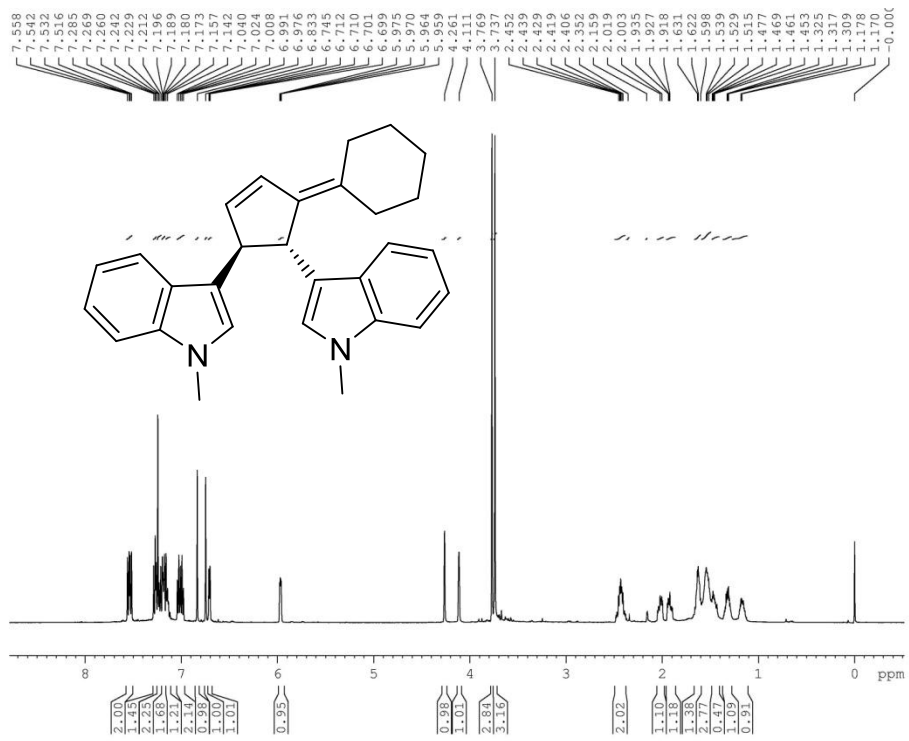

**<sup>1</sup>H NMR of 4ab**

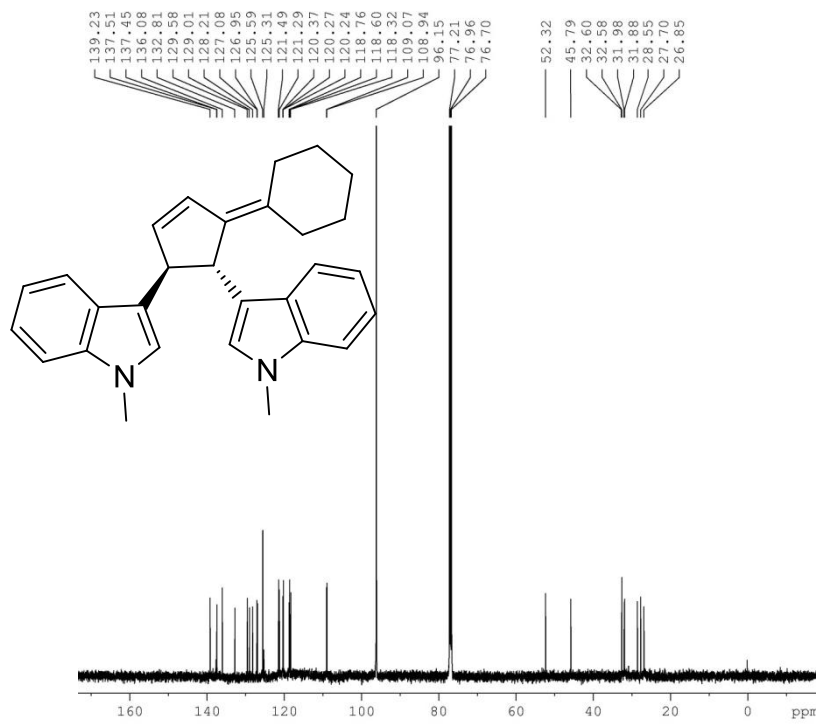

**<sup>13</sup>C NMR of 4ab**

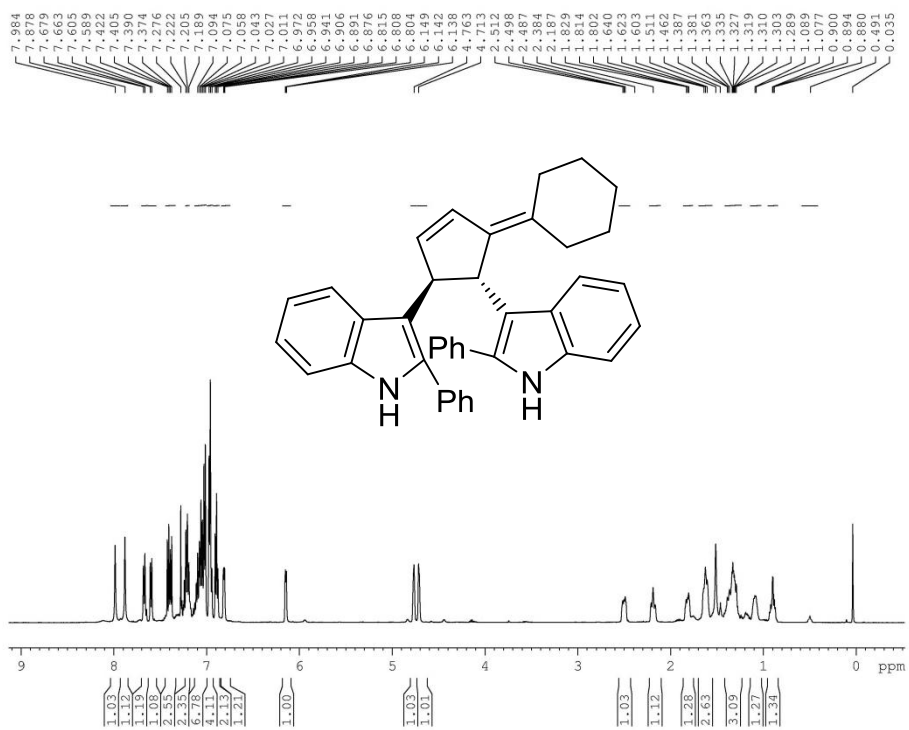

**<sup>1</sup>H NMR of 4ac**

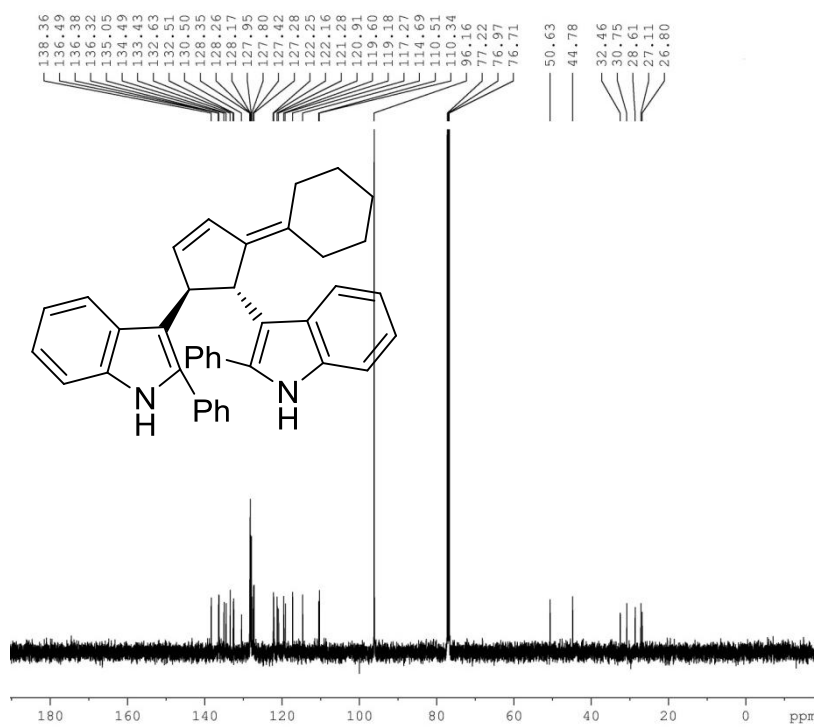

**<sup>13</sup>C NMR of 4ac**

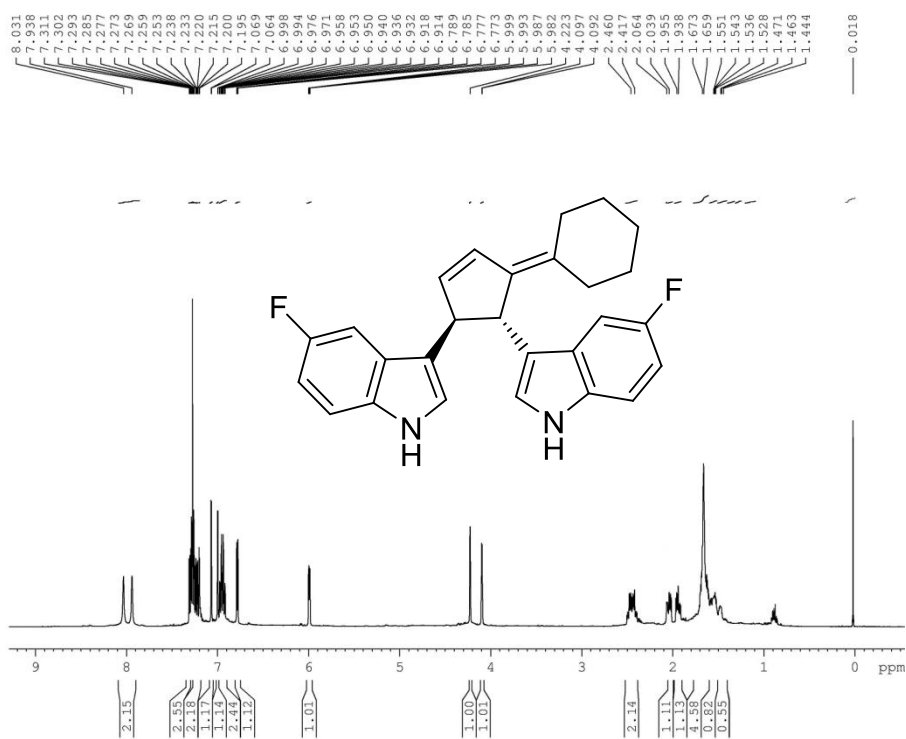

<sup>1</sup>H NMR of 4ad

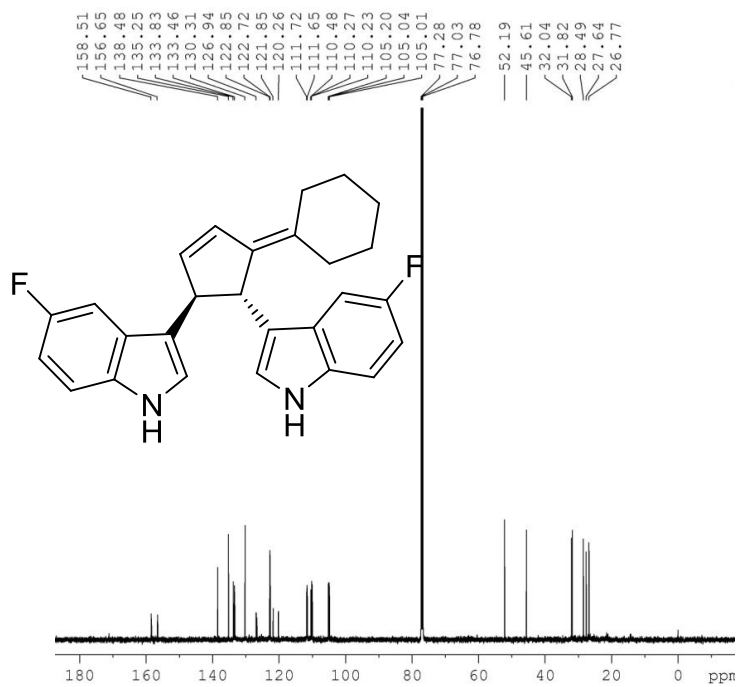

<sup>13</sup>C NMR of 4ad

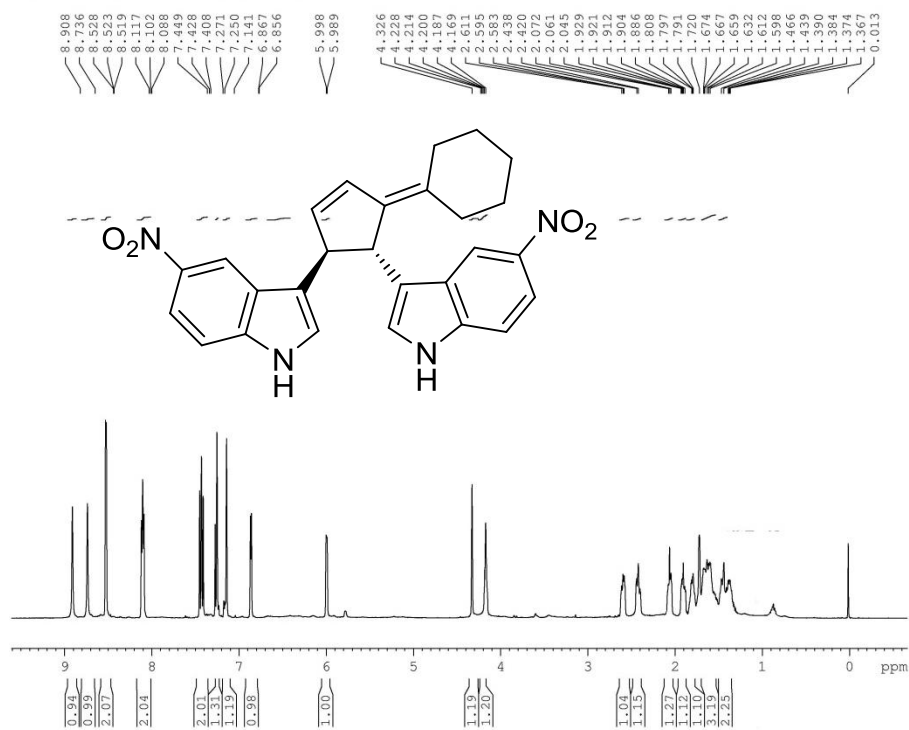

**<sup>1</sup>H NMR of 4ae**

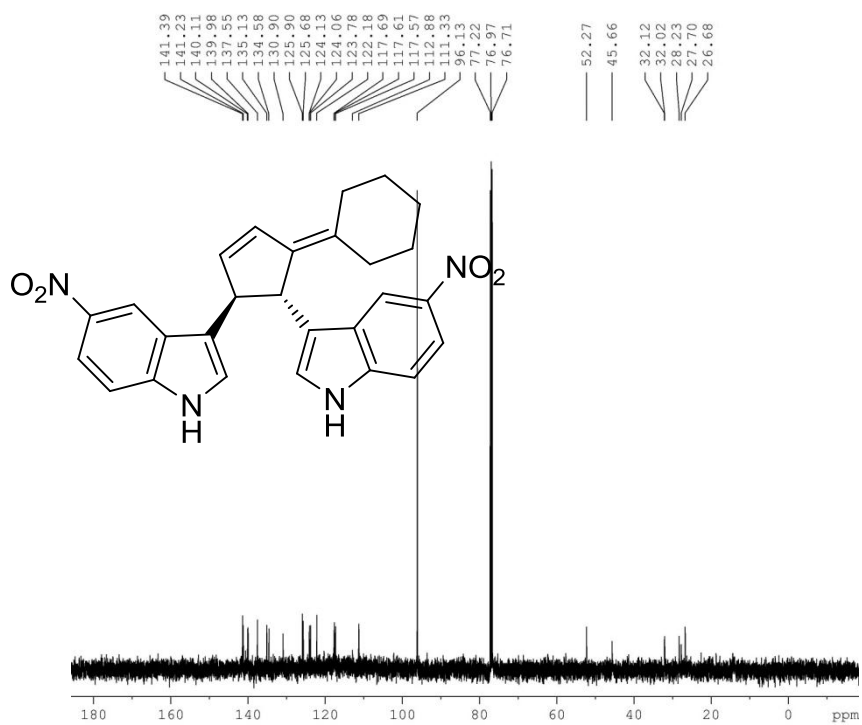

**<sup>13</sup>C NMR of 4ae**



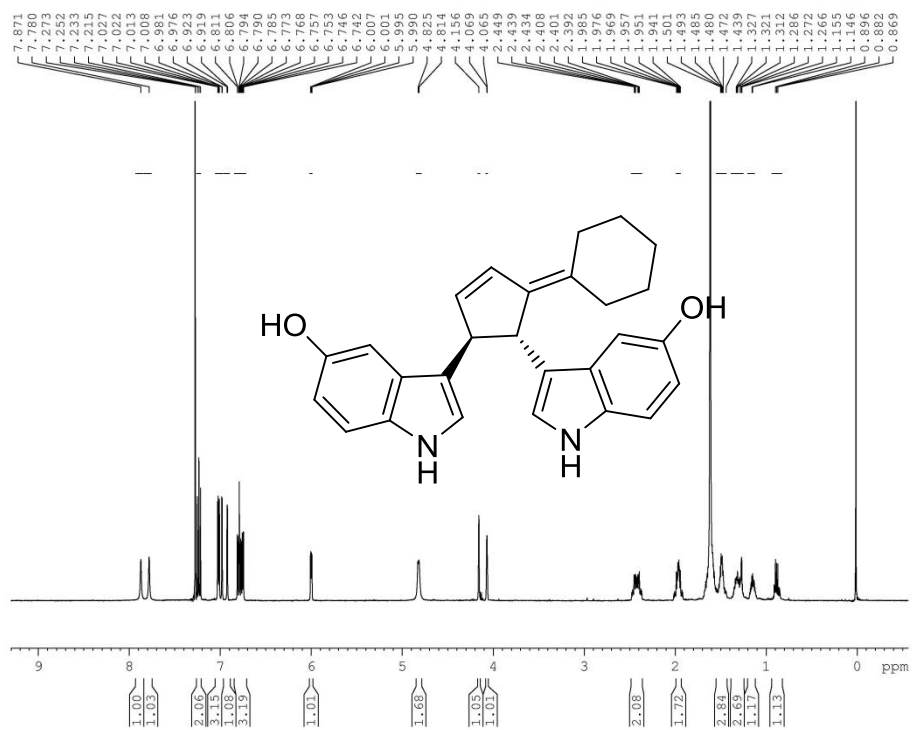

**<sup>1</sup>H NMR of 4af**

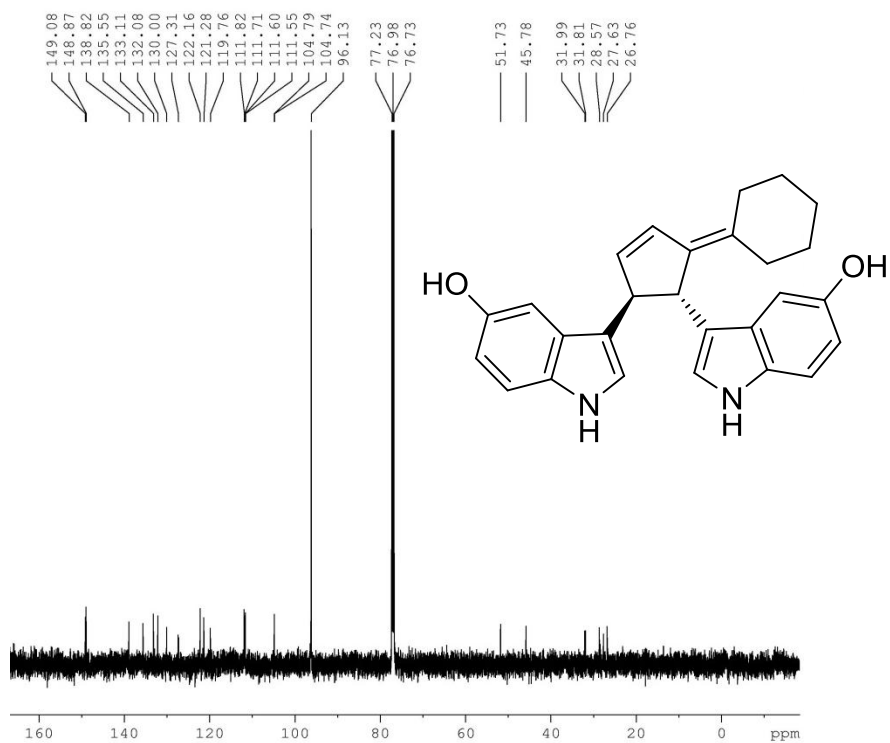

**<sup>13</sup>C NMR of 4af**

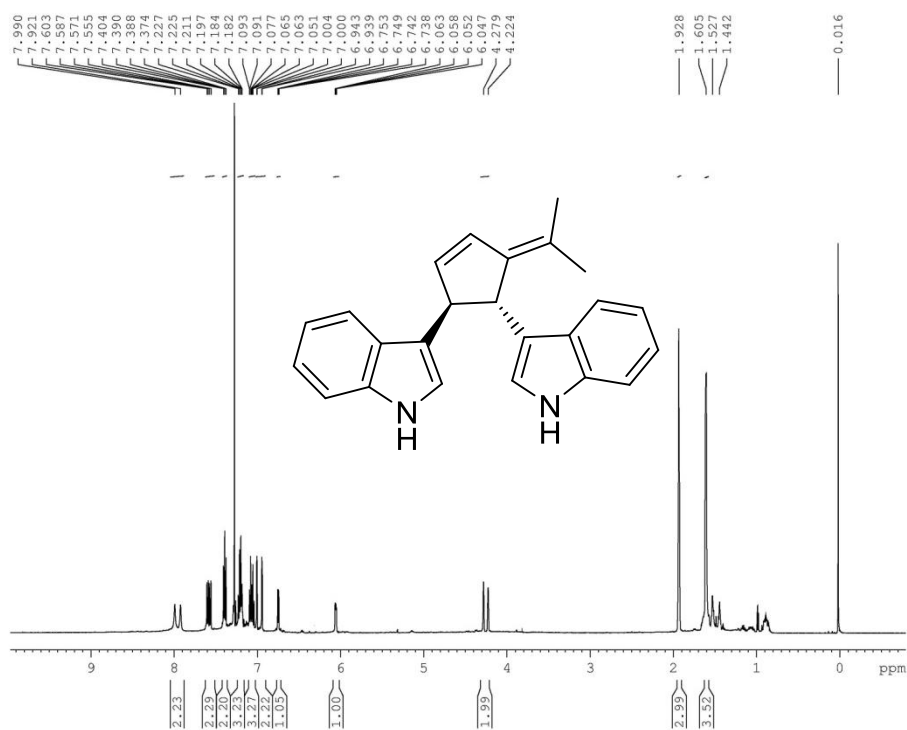

**<sup>1</sup>H NMR of 4ea**

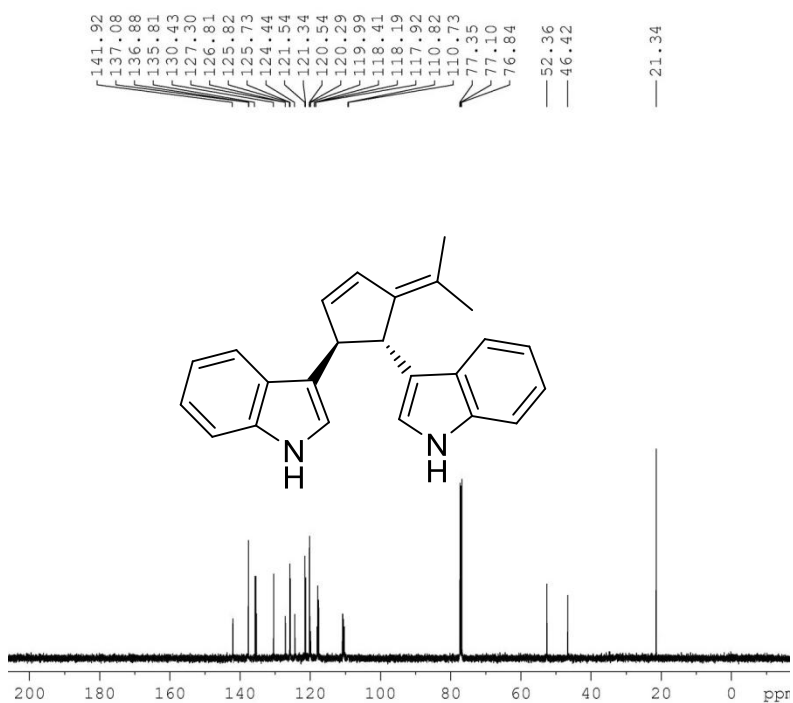

**<sup>13</sup>C NMR of 4ea**

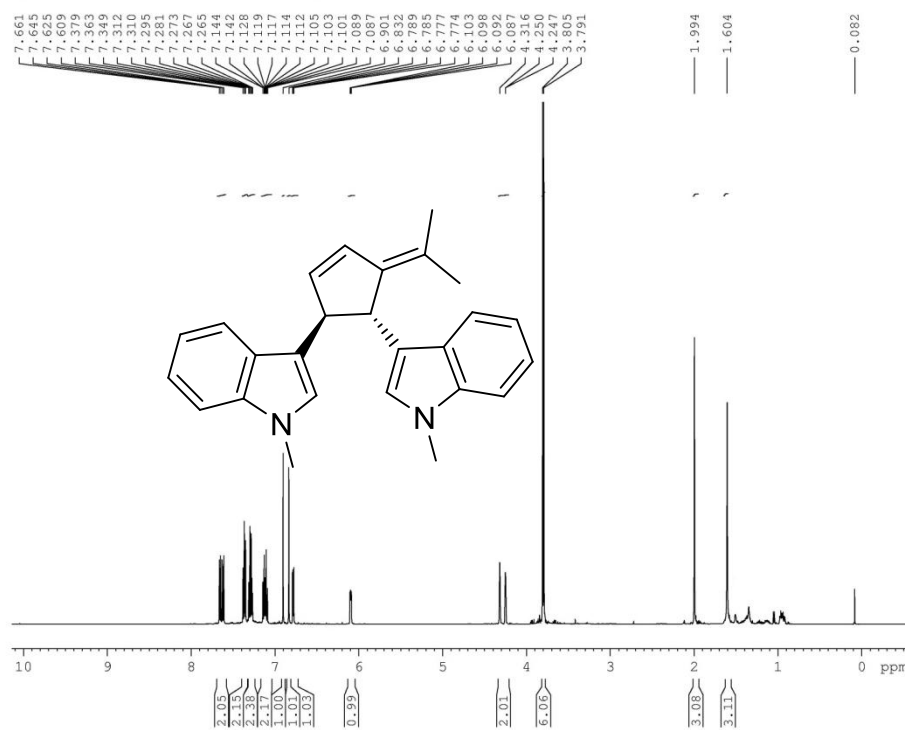

**<sup>1</sup>H NMR of 4eb**

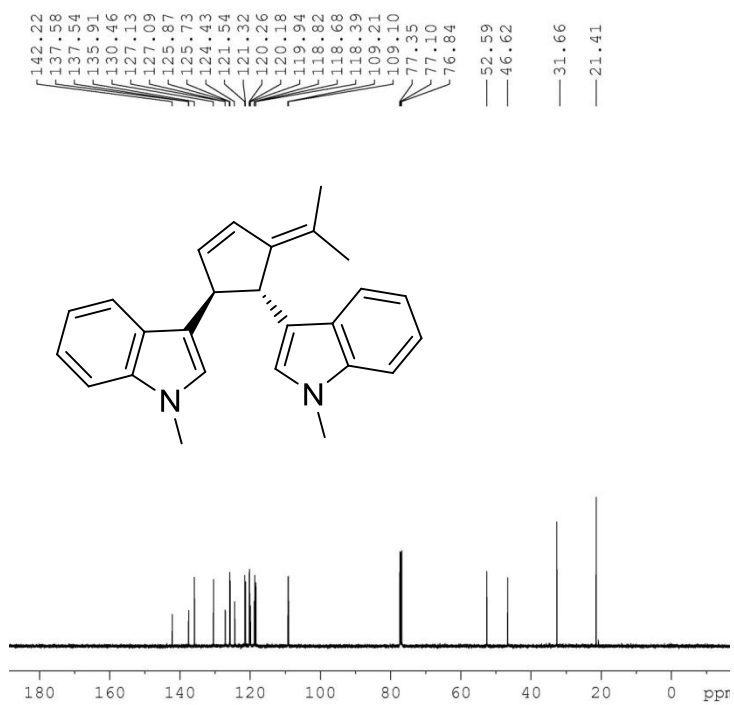

**<sup>13</sup>C NMR of 4eb**

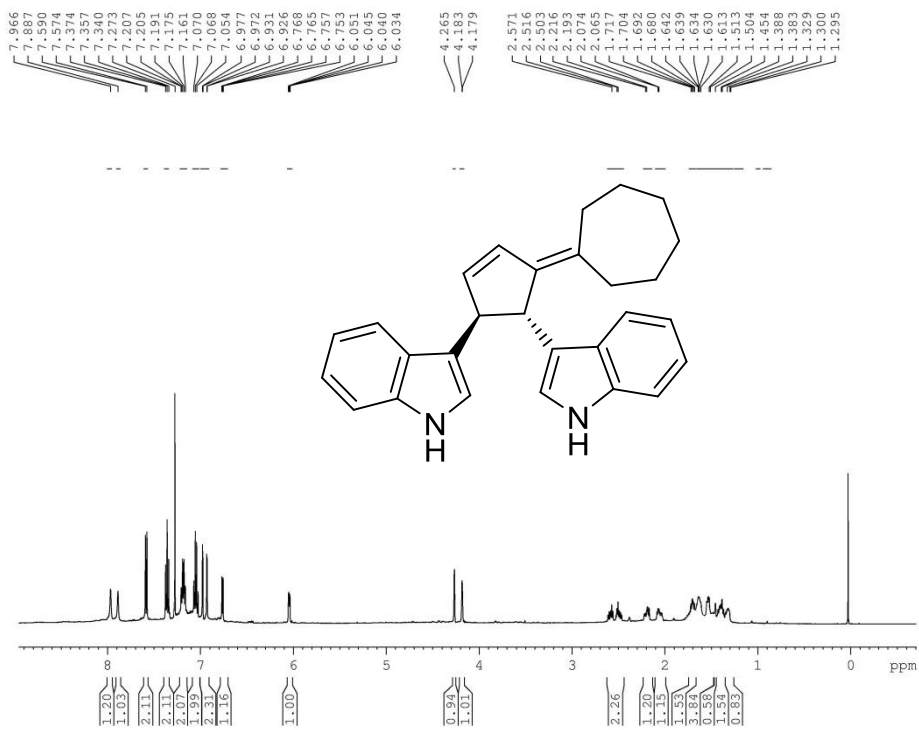

**<sup>1</sup>H NMR of 4fa**

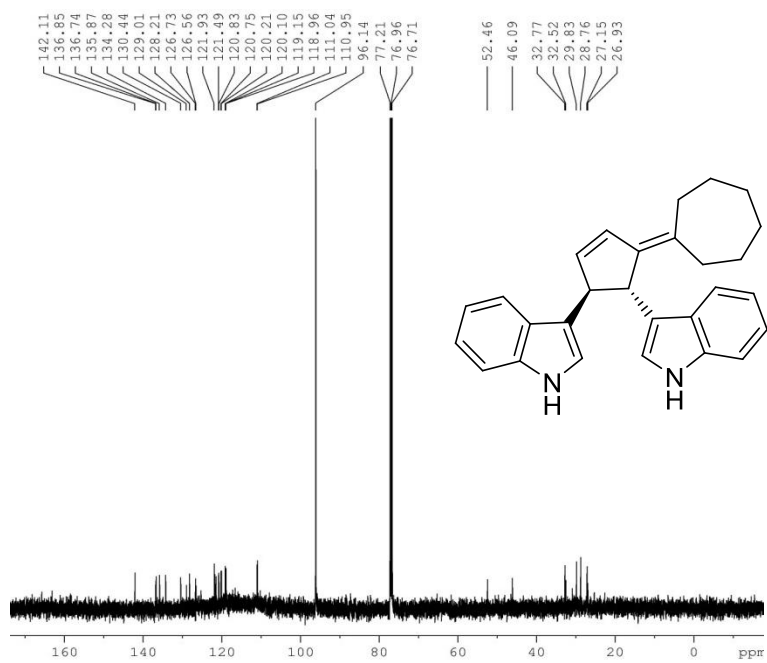

**<sup>13</sup>C NMR of 4fa**

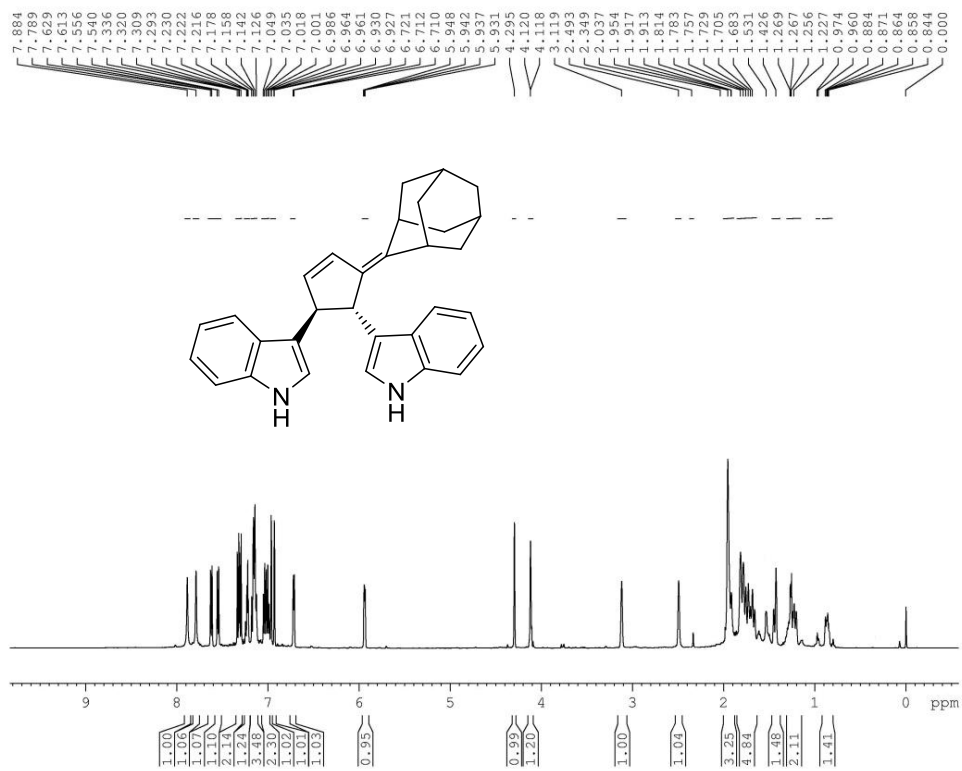

<sup>1</sup>H NMR of 4ga

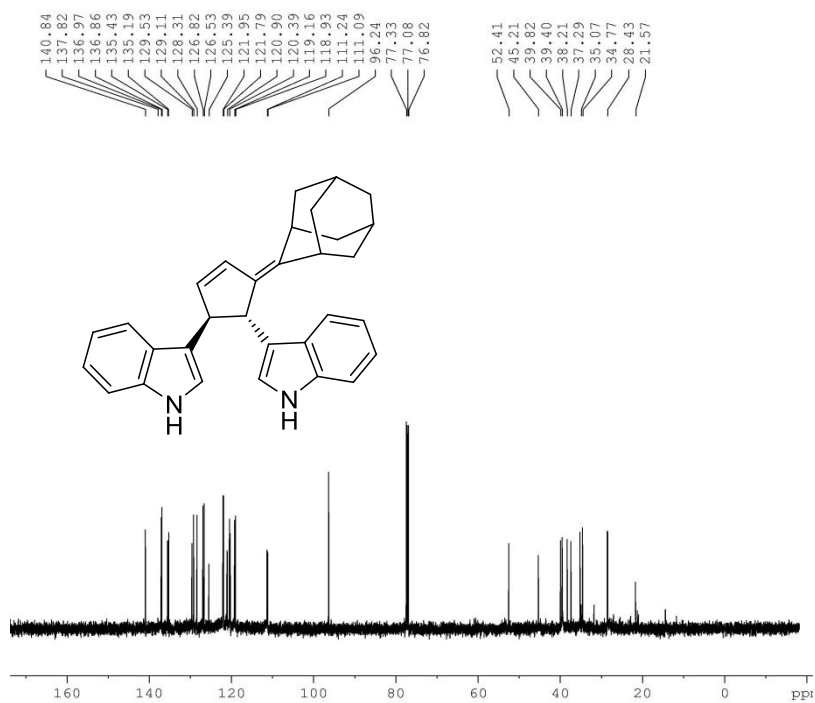

<sup>13</sup>C NMR of 4ga

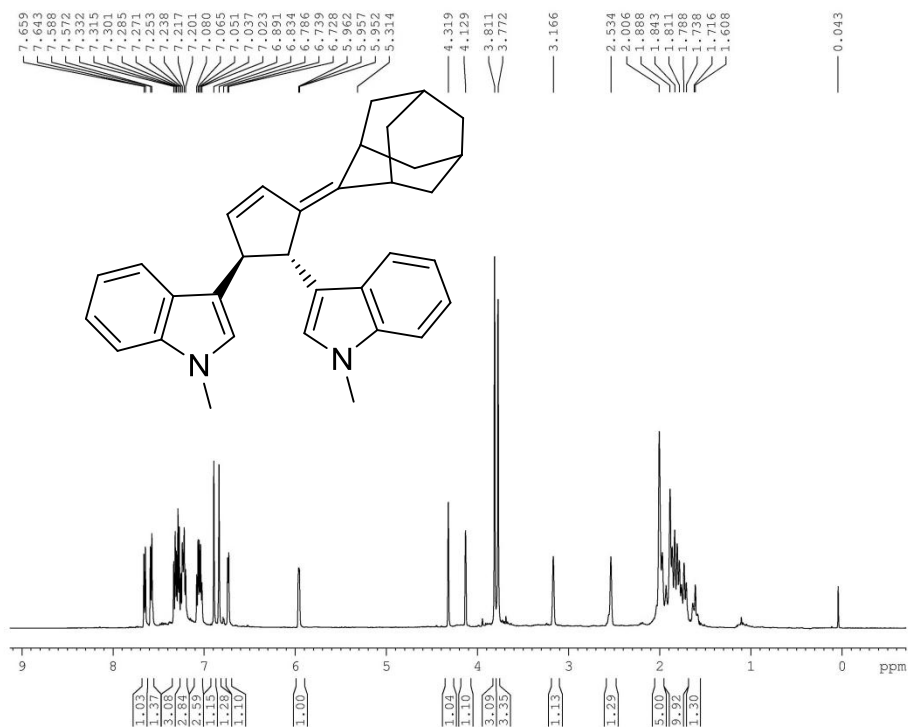

**<sup>1</sup>H NMR of 4gb**

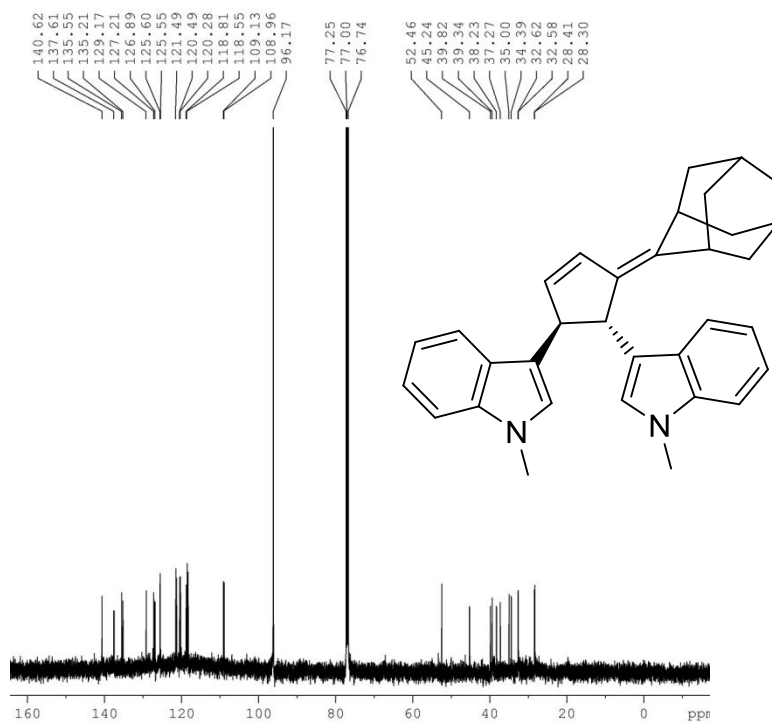

**<sup>13</sup>C NMR of 4gb**

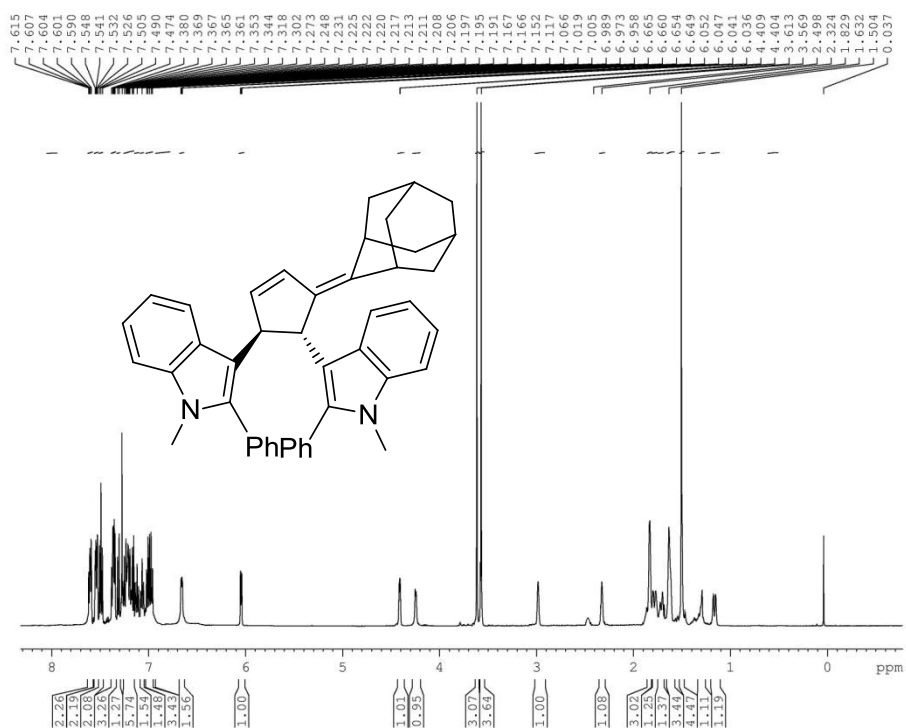

<sup>1</sup>H NMR of 4gc

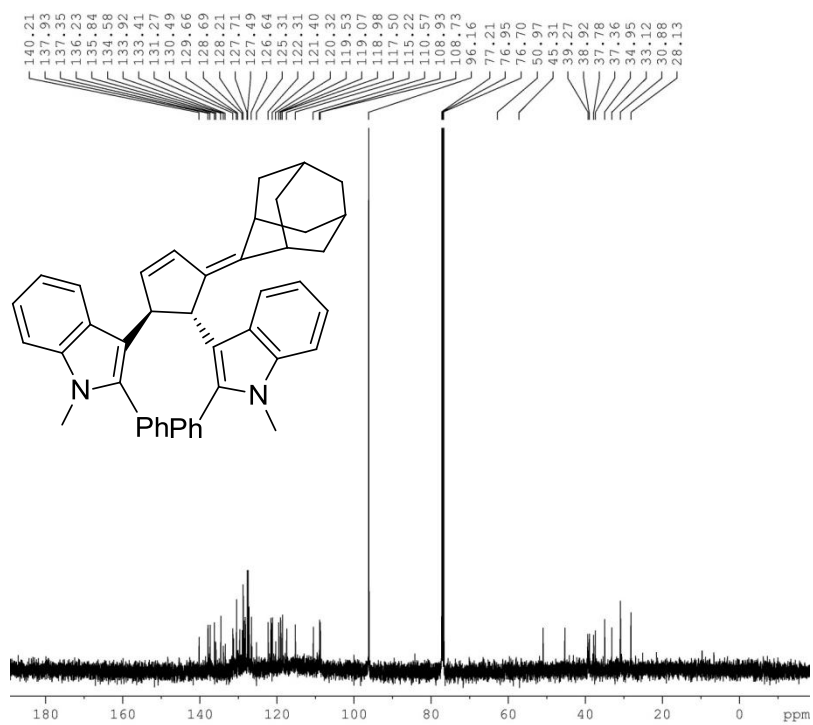

<sup>13</sup>C NMR of 4gc

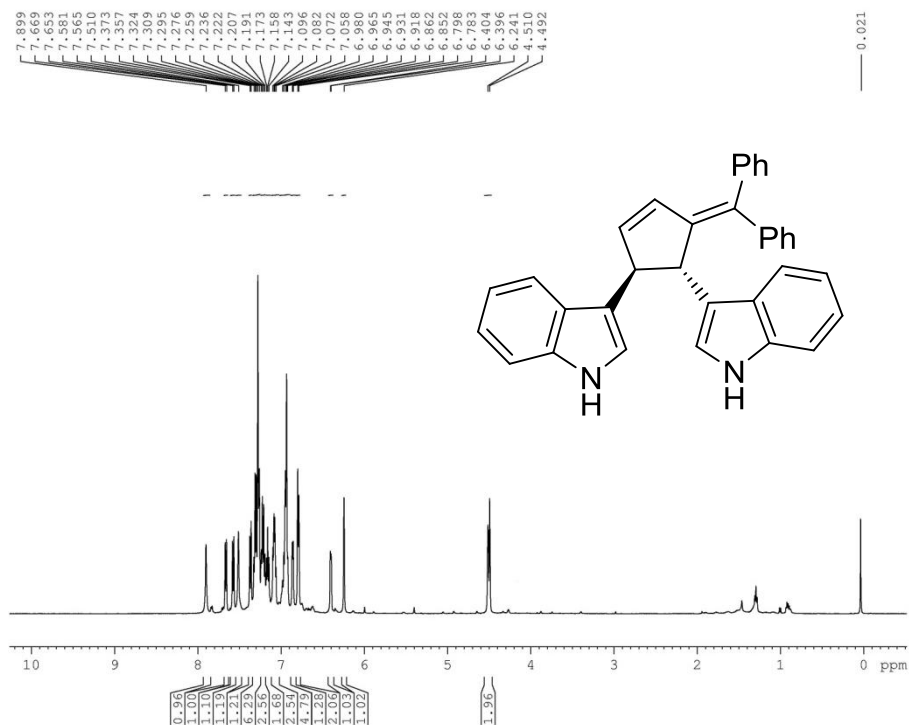

<sup>1</sup>H NMR of 4ha

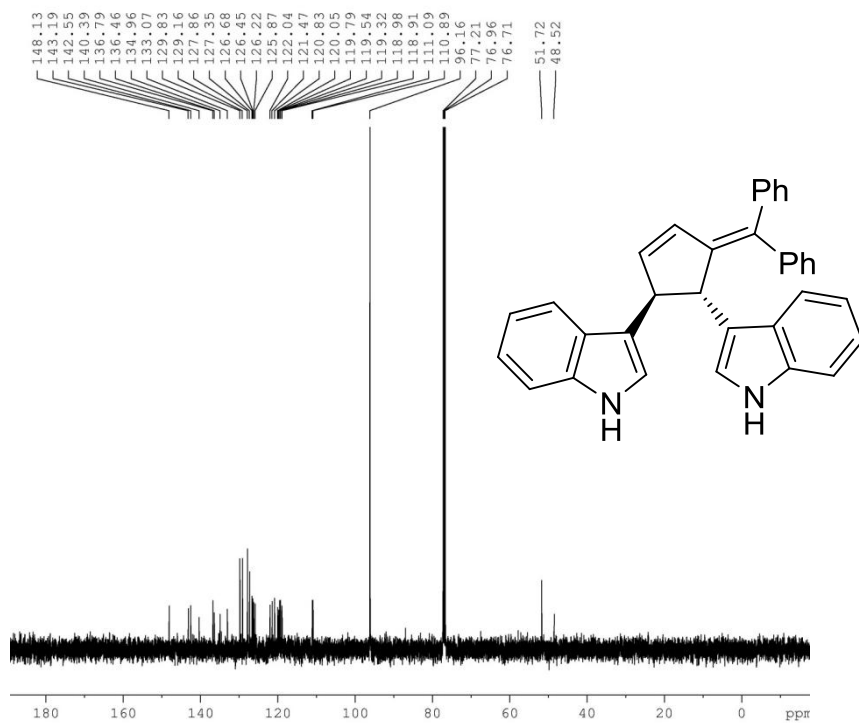

<sup>13</sup>C NMR of 4ha



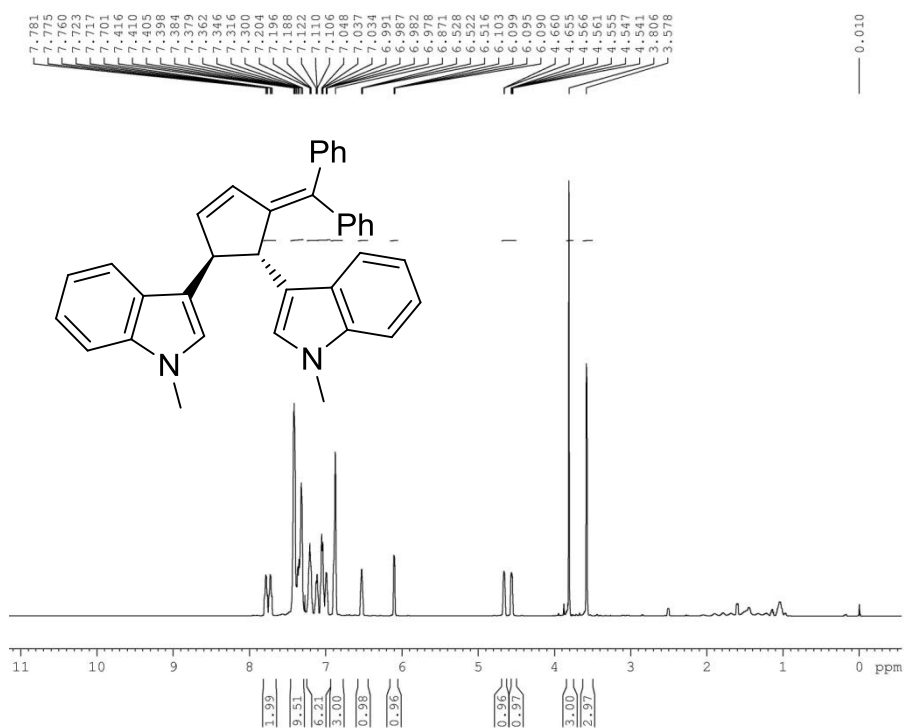

**<sup>1</sup>H NMR of 4hb**

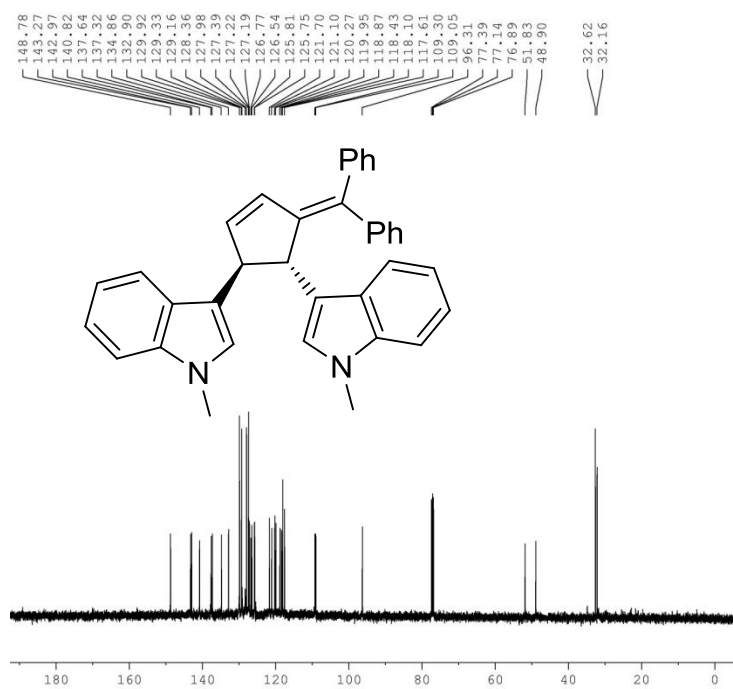

**<sup>13</sup>C NMR of 4hb**

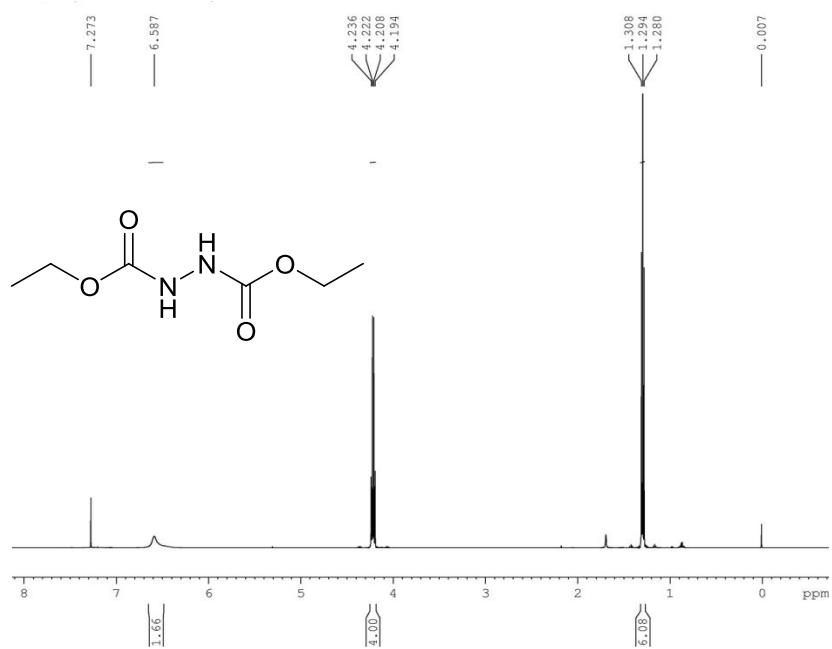

<sup>1</sup>H NMR of 5

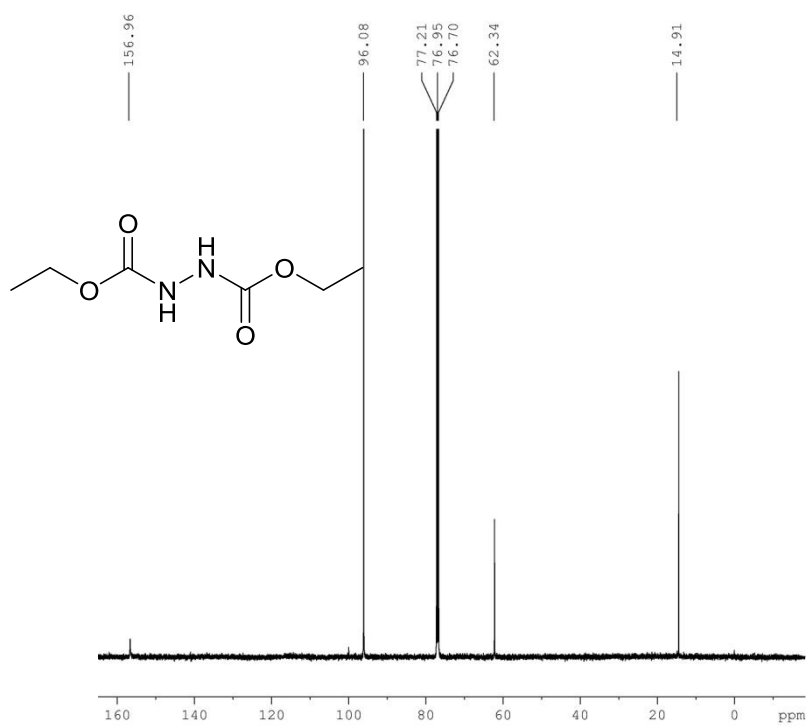

<sup>13</sup>C NMR of 5

# Supporting evidence for the mechanism from ESI-MS studies

## Elemental Composition Report

Page 1

### Single Mass Analysis

Tolerance = 5.0 PPM / DBE: min = -1.5, max = 50.0  
Element prediction: Off  
Number of isotope peaks used for i-FIT = 3

Monoisotopic Mass, Even Electron Ions

95 formula(e) evaluated with 1 results within limits (up to 50 best isotopic matches for each mass)

Elements Used:

C: 31-31 H: 0-1000 N: 3-3 O: 10-10 F: 1-6 Na: 0-1 S: 1-2 39K: 0-1 Sc: 0-1

PP2

14HR95 87 (2.806) AM (Cen,4, 80.00, Ar,5000.0,1072.25,0.70,LS 20); Sm (SG, 1x1.00); Sb (5,40.00); Cm (83-101)

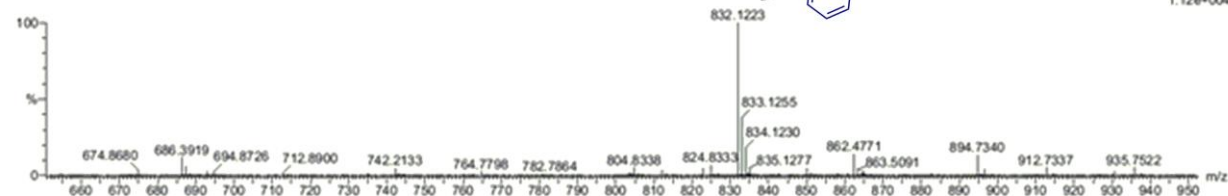

1: TOF MS ES+  
1.12e+004

Minimum: 500.0 5.0 -1.5  
Maximum: 500.0 5.0 50.0

| Mass     | Calc. Mass | mDa  | PPM  | DBE  | i-FIT | Formula                 |
|----------|------------|------|------|------|-------|-------------------------|
| 832.1223 | 832.1227   | -0.4 | -0.5 | 13.5 | 1.0   | C31 H35 N3 O10 F6 S2 Sc |

Mass spectrum of intermediate C

## Elemental Composition Report

Page 1

### Single Mass Analysis

Tolerance = 5.0 PPM / DBE: min = -1.5, max = 50.0  
Element prediction: Off  
Number of isotope peaks used for i-FIT = 3

Monoisotopic Mass, Even Electron Ions

8 formula(e) evaluated with 1 results within limits (up to 50 best isotopic matches for each mass)

Elements Used:

C: 23-23 H: 0-1000 N: 1-2 Na: 0-1 39K: 0-1

PP2

14HR95 136 (4.424) AM (Cen,4, 80.00, Ar,5000.0,172.88,0.70,LS 20); Sm (SG, 1x1.00); Sb (5,40.00); Cm (135-141)

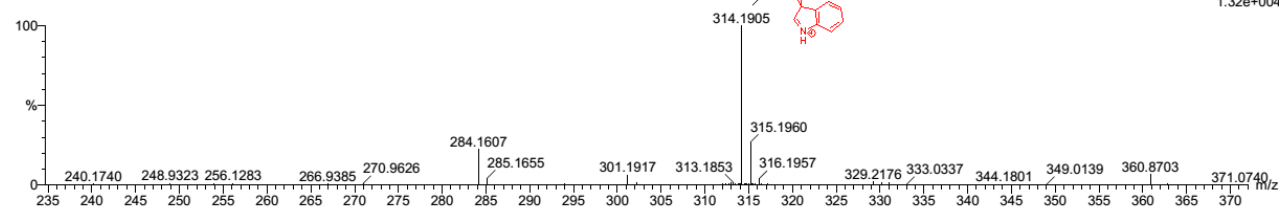

1: TOF MS ES+  
1.32e+004

Minimum: 500.0 5.0 -1.5  
Maximum: 500.0 5.0 50.0

| Mass     | Calc. Mass | mDa  | PPM  | DBE  | i-FIT | Formula   |
|----------|------------|------|------|------|-------|-----------|
| 314.1905 | 314.1909   | -0.4 | -1.3 | 12.5 | 6.6   | C23 H24 N |

Mass spectrum of intermediate D

## Compound 3eb

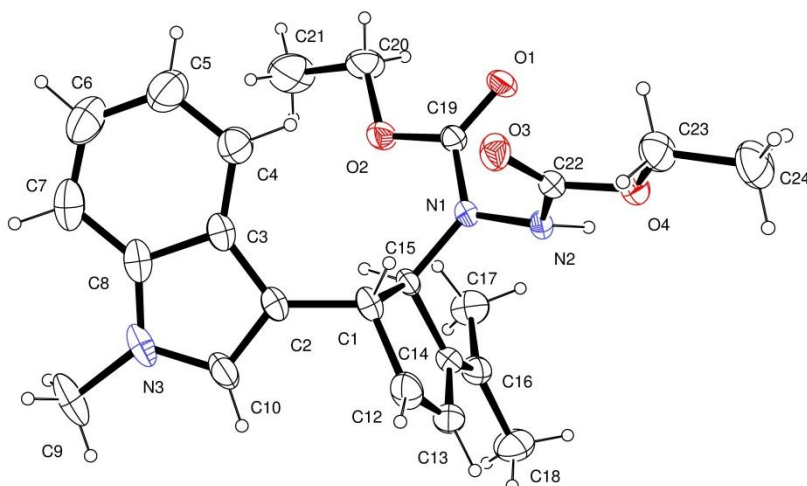

### CCDC Number: 1034718

|                         |                                                                  |
|-------------------------|------------------------------------------------------------------|
| Chemical_formula_moiety | 'C <sub>23</sub> H <sub>29</sub> N <sub>3</sub> O <sub>4</sub> ' |
| Chemical_formula_sum    | 'C <sub>23</sub> H <sub>29</sub> N <sub>3</sub> O <sub>4</sub> ' |
| Chemical_formula_weight | 411.49                                                           |

|                                |             |
|--------------------------------|-------------|
| Symmetry_cell_setting          | 'Triclinic' |
| Symmetry_space_group_name_H-M  | 'P-1'       |
| Symmetry_space_group_name_Hall | '-P 1'      |

|                              |             |
|------------------------------|-------------|
| Cell_length_a                | 8.5916(2)   |
| Cell_length_b                | 9.5191(3)   |
| Cell_length_c                | 14.2137(4)  |
| Cell_angle_alpha             | 81.1780(10) |
| Cell_angle_beta              | 86.5720(10) |
| Cell_angle_gamma             | 87.3920(10) |
| Cell_volume                  | 1145.87(6)  |
| Cell_formula_units_Z         | 2           |
| Cell_measurement_temperature | 296(2)      |
| Cell_measurement_reflns_used | 6522        |
| Cell_measurement_theta_min   | 2.85        |
| Cell_measurement_theta_max   | 24.67       |

|                                |                |
|--------------------------------|----------------|
| exptl_crystal_description      | 'block'        |
| exptl_crystal_colour           | 'yellow'       |
| exptl_crystal_size_max         | 0.25           |
| exptl_crystal_size_mid         | 0.15           |
| exptl_crystal_size_min         | 0.15           |
| exptl_crystal_density_meas     | 1.192          |
| exptl_crystal_density_diffn    | 1.193          |
| exptl_crystal_density_method   | 'not measured' |
| exptl_crystal_F_000            | 440            |
| exptl_absorpt_coefficient_mu   | 0.082          |
| exptl_absorpt_correction_type  | 'MULTI-SCAN'   |
| exptl_absorpt_correction_T_min | 0.9797         |
| exptl_absorpt_correction_T_max | 0.9878         |

## Compound 4ha

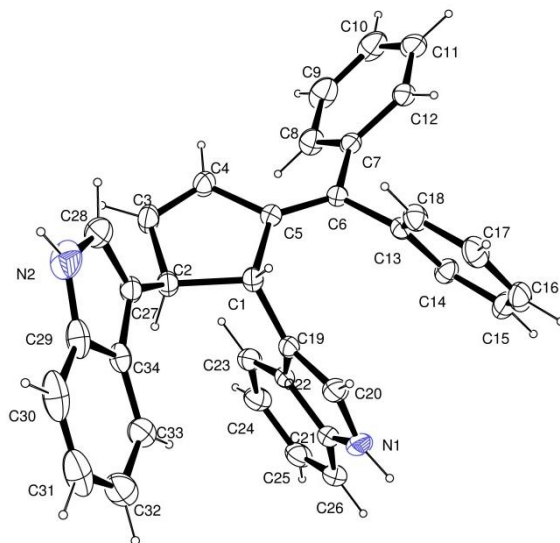

### CCDC Number: 989506

|                               |                                                   |
|-------------------------------|---------------------------------------------------|
| Chemical_formula_moiety       | 'C <sub>34</sub> H <sub>26</sub> N <sub>2</sub> ' |
| Chemical_formula_sum          | 'C <sub>34</sub> H <sub>26</sub> N <sub>2</sub> ' |
| Chemical_formula_weight       | 462.57                                            |
| Symmetry_cell_setting         | 'Monoclinic'                                      |
| Symmetry_space_group_name_H-M | 'P2(1)/n'                                         |
| Cell_length_a                 | 15.594(5)                                         |
| Cell_length_b                 | 9.946(5)                                          |
| Cell_length_c                 | 17.135(5)                                         |
| Cell_angle_alpha              | 90.000(5)                                         |
| Cell_angle_beta               | 109.110(5)                                        |
| Cell_angle_gamma              | 90.000(5)                                         |
| Cell_volume                   | 2511.1(17)                                        |
| Cell_formula_units_Z          | 4                                                 |
| Cell_measurement_temperature  | 296(2)                                            |
| Cell_measurement_reflns_used  | 7057                                              |
| Cell_measurement_theta_min    | 2.40                                              |
| Cell_measurement_theta_max    | 25.96                                             |
| Exptl_crystal_description     | 'block'                                           |
| Exptl_crystal_colour          | 'colourless'                                      |
| Exptl_crystal_size_max        | 0.25                                              |
| Exptl_crystal_size_mid        | 0.15                                              |
| Exptl_crystal_size_min        | 0.15                                              |
| Exptl_crystal_density_meas    | 1.223                                             |
| Exptl_crystal_density_diffn   | 1.224                                             |

|                                |                |
|--------------------------------|----------------|
| Exptl_crystal_density_method   | 'not measured' |
| Exptl_crystal_F_000            | 976            |
| Exptl_absorpt_coefficient_mu   | 0.071          |
| Exptl_absorpt_correction_type  | 'MULTI-SCAN'   |
| Exptl_absorpt_correction_T_min | 0.9824         |
| Exptl_absorpt_correction_T_max | 0.9894         |
